# Supplementary material for: The timing of administering aspirin and nitroglycerin in patients with STEMI ECG changes alter patient outcome
Source: BMC Emerg Med. 2021 Nov 17;21:137. doi: 10.1186/s12873-021-00523-2 (PMC8597308; doi:10.1186/s12873-021-00523-2)
Supplement: Supplementary file 6 — Additional file 6. [file 12873_2021_523_MOESM6_ESM.xlsx]

## Sheet: process
Old code	Add this code	No. of patients	(+)	(O)	(-)	new code – previous NTGs included
N10	n10	1		1		N10 = N1020	EXAMPLE FOR THIS ENTRY			1801476	1387512	4917	Nitroglycerin	0.4	3706021	9916003	7701001	9923001	2017-02-06 05:27:00
N10	N1020	2		4		N10 = N102030				1801478	1387512	7806	Oxygen	10	3706011	9916003	7701001	9923001	2017-02-06 05:29:00
N102+	N1+	1	1			N102+ = N1+203+				1801479	1387512	4917	Nitroglycerin	0.4	3706021	9916003	7701001	9923001	2017-02-06 05:29:00
N102+30	N1+2+	2	4			N102+30 = N1+2+304+50				1801477	1387512	1191	Aspirin	324	3706021	9916003	9905013	9923001	2017-02-06 05:29:00	N10	NEW CODE N1020
N1020	N1+2+	2	4			N1020 = N1+2+3040
N1020	n10	1		1		N1020 = N102030
N20203040	n10	1		1		N20203040 = N1020304050
N3+	N3+	1	1			N3+ = N3+2+
N3+	N30	1		1		N3+ = N302+
N3+20	N3+	1	1			N3+20 = N3+2+30
N30	n10	1		1		N30 = N1020
N302+3+4+	N3+	1	1			N302+3+4+ = N3+203+4+5+
N40	N3+	1	1			N40 = N3+20
N5+	N3+	1	1			N5+ = N3+2+
N5+2+	N4+	1	1			N5+2+ = N4+2+3+
N5+2+	N5+	1	1			N5+2+ = N5+2+3+
N5+2+	N30	1		1		N5+2+ = N302+3+
N5+2+3+	N5+	1	1			N5+2+3+ = N5+2+3+4+
N50	N1+	1	1			N50 = N1+20
N50	N5+	1	1			N50 = N5+20
N50	N50	1		1		N50 = N5020
N50	n10	1		1		N50 = N1020
N50	N3+	1	1			N50 = N3+20
N50	N3+2+	2	4			N50 = N3+2+30
N50	N3020	2		4		N50 = N302030
N50	N30	1		1		N50 = N30200
N502+	N50	1		1		N502+ = N50203+
N502+	N3020	2		4		N502+ = N3020304+
N5020	n10	1		1		N5020 = N102030
N5020	N30	1		1		N5020 = N302030
		36	24	24

## Sheet: manual
Old code	Add this code	New code
N1+		N1+
N1+		N1+
N1+		N1+
N1+		N1+
N1+		N1+
N1+		N1+
N1+		N1+
N1+		N1+
N1+		N1+
N1+		N1+
N1+		N1+
N1+		N1+
N1+		N1+
N1+		N1+
N1+		N1+
N1+		N1+
N1+		N1+
N1+		N1+
N1+		N1+
N1+		N1+
N1+		N1+
N1+		N1+
N1+		N1+
N1+		N1+
N1+		N1+
N1+		N1+
N1+		N1+
N1+		N1+
N1+		N1+
N1+		N1+
N1+		N1+
N1+		N1+
N1+		N1+
N1+		N1+
N1+		N1+
N1+		N1+
N1+		N1+
N1+		N1+
N1+		N1+
N1+		N1+
N1+2+		N1+2+
N1+2+		N1+2+
N1+2+		N1+2+
N1+2+		N1+2+
N1+2+		N1+2+
N1+2+		N1+2+
N1+2+		N1+2+
N1+2+		N1+2+
N1+2+		N1+2+
N1+2+		N1+2+
N1+2+3+		N1+2+3+
N1+2+3+		N1+2+3+
N1+2+3+		N1+2+3+
N1+2+3+		N1+2+3+
N1+2+3+		N1+2+3+
N1+2+3+		N1+2+3+
N1+2+3+		N1+2+3+
N1+2030		N1+2030
N10		N10
N10		N10
N10	n10	N1020
N10		N10
N10		N10
N10		N10
N10		N10
N10		N10
N10		N10
N10		N10
N10		N10
N10		N10
N10		N10
N10		N10
N10		N10
N10		N10
N10		N10
N10		N10
N10		N10
N10		N10
N10		N10
N10		N10
N10		N10
N10		N10
N10		N10
N10		N10
N10		N10
N10		N10
N10		N10
N10		N10
N10		N10
N10		N10
N10		N10
N10		N10
N10		N10
N10		N10
N10		N10
N10		N10
N10		N10
N10		N10
N10		N10
N10		N10
N10		N10
N10		N10
N10		N10
N10		N10
N10		N10
N10		N10
N10		N10
N10		N10
N10		N10
N10		N10
N10		N10
N10		N10
N10		N10
N10		N10
N10		N10
N10		N10
N10		N10
N10		N10
N10		N10
N10		N10
N10		N10
N10		N10
N10		N10
N10		N10
N10		N10
N10		N10
N10		N10
N10		N10
N10		N10
N10		N10
N10		N10
N10		N10
N10		N10
N10	N1020	N102030
N10		N10
N10		N10
N10		N10
N10		N10
N10		N10
N10		N10
N10		N10
N10		N10
N10		N10
N10		N10
N10		N10
N10		N10
N10		N10
N10		N10
N10		N10
N102+		N102+
N102+		N102+
N102+	N1+	N1+203+
N102+		N102+
N102+		N102+
N102+		N102+
N102+		N102+
N102+		N102+
N102+		N102+
N102+		N102+
N102+		N102+
N102+		N102+
N102+		N102+
N102+		N102+
N102+		N102+
N102+		N102+
N102+		N102+
N102+		N102+
N102+3+		N102+3+
N102+3+		N102+3+
N102+3+		N102+3+
N102+3+		N102+3+
N102+3+		N102+3+
N102+3+		N102+3+
N102+3+		N102+3+
N102+3+		N102+3+
N102+3+		N102+3+
N102+3+		N102+3+
N102+3+		N102+3+
N102+3+4+5+		N102+3+4+5+
N102+3+4+5+6+		N102+3+4+5+6+
N102+3+4+5+6+		N102+3+4+5+6+
N102+3+405+6+7+		N102+3+405+6+7+
N102+3+4050		N102+3+4050
N102+30	N1+2+	N1+2+304+50
N102+30		N102+30
N102+30		N102+30
N1020		N1020
N1020		N1020
N1020		N1020
N1020		N1020
N1020		N1020
N1020	N1+2+	N1+2+3040
N1020		N1020
N1020		N1020
N1020		N1020
N1020		N1020
N1020	n10	N102030
N1020		N1020
N1020		N1020
N1020		N1020
N1020		N1020
N1020		N1020
N1020		N1020
N1020		N1020
N1020		N1020
N1020		N1020
N1020		N1020
N1020		N1020
N1020		N1020
N1020		N1020
N1020		N1020
N1020		N1020
N1020		N1020
N1020		N1020
N1020		N1020
N10203+		N10203+
N10203+40		N10203+40
N102030		N102030
N102030		N102030
N102030		N102030
N102030		N102030
N102030		N102030
N102030		N102030
N102030		N102030
N102030		N102030
N102030		N102030
N102030		N102030
N102030		N102030
N102030		N102030
N102030		N102030
N102030		N102030
N10203040		N10203040
N1020304050		N1020304050
N1020304050		N1020304050
N2+		N2+
N2+		N2+
N2+		N2+
N2+		N2+
N2+2+		N2+2+
N2+2+3+		N2+2+3+
N2+2+3+		N2+2+3+
N2+2+3+		N2+2+3+
N20		N20
N20		N20
N20		N20
N20		N20
N20		N20
N20		N20
N202+		N202+
N202+3+		N202+3+
N202+304+		N202+304+
N2020		N2020
N2020		N2020
N2020		N2020
N2020		N2020
N20203-		N20203-
N202030		N202030
N202030		N202030
N2020304+		N2020304+
N20203040	n10	N1020304050
N3+	N3+	N3+2+
N3+		N3+
N3+		N3+
N3+	N30	N302+
N3+		N3+
N3+		N3+
N3+2+		N3+2+
N3+2+		N3+2+
N3+20	N3+	N3+2+30
N30		N30
N30		N30
N30		N30
N30		N30
N30	n10	N1020
N30		N30
N30		N30
N30		N30
N302+		N302+
N302+		N302+
N302+		N302+
N302+		N302+
N302+3+		N302+3+
N302+3+4+	N3+	N3+203+4+5+
N3020		N3020
N3020		N3020
N4+		N4+
N4+2+		N4+2+
N4+2+		N4+2+
N40		N40
N40		N40
N40	N3+	N3+20
N40		N40
N402+		N402+
N4020		N4020
N4020		N4020
N5+		N5+
N5+		N5+
N5+		N5+
N5+		N5+
N5+		N5+
N5+		N5+
N5+		N5+
N5+	N3+	N3+2+
N5+		N5+
N5+		N5+
N5+2+		N5+2+
N5+2+	N4+	N4+2+3+
N5+2+	N5+	N5+2+3+
N5+2+	N30	N302+3+
N5+2+3+	N5+	N5+2+3+4+
N50		N50
N50		N50
N50	N1+	N1+20
N50		N50
N50		N50
N50		N50
N50		N50
N50	N5+	N5+20
N50	N50	N5020
N50	n10	N1020
N50		N50
N50		N50
N50		N50
N50	N3+	N3+20
N50		N50
N50		N50
N50		N50
N50	N3+2+	N3+2+30
N50	N3020	N302030
N50	N30	N3020
N50		N50
N50		N50
N502+		N502+
N502+		N502+
N502+		N502+
N502+		N502+
N502+	N50	N50203+
N502+		N502+
N502+	N3020	N3020304+
N502+3+		N502+3+
N5020		N5020
N5020	n10	N102030
N5020		N5020
N5020		N5020
N5020	N30	N302030
N5020		N5020
N502030		N502030
N5020304050		N5020304050
