# Supplementary material for: The timing of administering aspirin and nitroglycerin in patients with STEMI ECG changes alter patient outcome
Source: BMC Emerg Med. 2021 Nov 17;21:137. doi: 10.1186/s12873-021-00523-2 (PMC8597308; doi:10.1186/s12873-021-00523-2)
Supplement: Supplementary file 15 — Additional file 15. [file 12873_2021_523_MOESM15_ESM.xlsx]

## Sheet: Sheet1
3495739	1870079	1191	Aspirin	324	3706021	9916001	9905013	9923001	2017-03-14 16:02:00	N1+	9901051	9901051
3360786	2482602	1191	Aspirin	243	3706021	9916001	9905013	9923001	2017-02-01 09:36:00	N1+	9901055	9901055
4012245	3009710	1191	Aspirin	324	3706021	9916001	9905013	9923001	2017-04-30 13:25:00	N1+	9901053	9901053
4856558	3631422	1191	Aspirin	324	3706021	9916001	9905013	9923001	2017-06-08 05:42:31	N1+	9901051	9901051
12215186	3942286	1191	Aspirin	325	3706021	9916001	9905007	9923001	2017-06-11 04:24:00	N1+	9901051	9901051
7053162	5332467	1191	Aspirin	243	3706021	9916001	9905013	9923001	2017-08-03 14:33:00	N1+	9901051	9901051
7291979	5497757	1191	Aspirin	324	3706021	9916001	9905013	9923001	2017-08-23 08:18:00	N1+	9901053	9901053
7867491	5940041	1191	Aspirin	324	3706021	9916001	9905013	9923001	2017-04-19 08:35:00	N1+	9901053	9901053
8178932	6161981	1191	Aspirin	162	3706021	9916001	9905013	9923001	2017-09-12 23:40:00	N1+	9901055	9901055
8418034	6209912	1191	Aspirin	325	3706021	9916001	9905013	9923001	2017-09-21 12:25:00	N1+	9901051	9901051
8991729	6507195	1191	Aspirin	324	3706021	9916001	7701001	9923001	2017-02-18 06:26:00	N1+	9901053	9901053
9215051	6670204	1191	Aspirin	324	3706021	9916001	9905007	9923001	2017-05-08 15:52:00	N1+	9901057	9901057
10577826	6933624	1191	Aspirin	324	3706021	9916001	9905001	9923001	2017-10-10 14:55:00	N1+	9901055	9901055
9771875	7098309	1191	Aspirin	162	3706021	9916001	7701001	9923001	2017-10-27 08:03:00	N1+	9901053	9901053
19562061	7107334	1191	Aspirin	324	3706021	9916001	9905007	9923001	2017-10-22 15:59:00	N1+	9901051	9901051
9942673	7216150	1191	Aspirin	324	3706021	9916001	9905013	9923001	2017-10-29 10:00:00	N1+	9901051	9901051
15701383	7471436	1191	Aspirin	324	3706021	9916001	9905011	9923001	2017-07-01 22:31:00	N1+	9901057	9901057
10697962	7725813	1191	Aspirin	324	3706021	9916001	9905007	9923001	2017-11-06 21:19:00	N1+	9901053	9901053
11270182	8005344	1191	Aspirin	324	3706021	9916001	9905013	9923001	2017-12-05 23:40:54	N1+	9901051	9901051
11149859	8039315	1191	Aspirin	325	3706021	9916001	9905013	9923001	2017-08-30 11:45:00	N1+	9901051	9901051
11476947	8294032	1191	Aspirin	324	3706021	9916001	9905007	9923001	2017-12-07 20:40:33	N1+	9901051	9901051
11752668	8449305	1191	Aspirin	324	3706021	9916001	9905041	9923003	2017-01-14 06:00:00	N1+	9901055	9901055
11756972	8452618	1191	Aspirin	325	3706021	9916001	9905007	9923001	2017-01-19 17:07:00	N1+	9901051	9901051
12378769	8903419	1191	Aspirin	324	3706021	9916001	7701001	9923003	2017-12-31 11:38:00	N1+	9901053	9901053
16926717	9938963	1191	Aspirin	324	3706021	9916001	9905007	9923003	2017-12-02 17:56:12	N1+	9901055	9901055
15764083	11311887	1191	Aspirin	325	3706021	9916001	7701003	9923001	2017-05-30 06:12:00	N1+	9901053	9901053
16095833	11565466	1191	Aspirin	324	3706021	9916001	7701003	9923001	2017-06-25 07:41:10	N1+	9901055	9901055
16663845	11869460	1191	Aspirin	324	3706021	9916001	9905013	9923001	2017-07-09 00:31:00	N1+	9901051	9901051
16633534	11879489	1191	Aspirin	324	3706021	9916001	9905013	7701003	2017-06-25 23:57:00	N1+	9901051	9901051
16746189	11885936	1191	Aspirin	324	3706021	9916001	9905013	9923003	2017-07-10 07:29:56	N1+	9901053	9901053
19276087	13507463	1191	Aspirin	324	3706021	9916001	9905005	9923001	2017-09-21 04:36:40	N1+	9901053	9901053
20141809	13563325	1191	Aspirin	324	3706021	9916001	9905019	9923001	2017-09-04 21:51:00	N1+	9901051	9901051
21643766	15192021	1191	Aspirin	324	3706021	9916001	9905013	9923001	2017-01-02 12:52:00	N1+	9901051	9901051
21723381	15258434	1191	Aspirin	162	3706021	9916001	9905007	9923001	2017-01-13 15:58:00	N1+	9901051	9901051
6565594	4542307	4917	Nitroglycerin	400	3706015	9916001	9905013	9923001	2017-07-11 09:56:00	N1+2+	9901055	9901055
6119110	4608372	4917	Nitroglycerin	13	3706029	9916001	9905013	9923001	2017-07-18 10:50:10	N1+2+	9901051	9901051
6419980	4868872	4917	Nitroglycerin	0.4	3706021	9916001	9905013	9923001	2017-07-26 15:19:00	N1+2+	9901055	9901055
8549710	5739355	4917	Nitroglycerin	0.4	3706021	9916001	9905013	9923001	2017-03-19 18:00:00	N1+2+	9901055	9901055
8903080	6443353	4917	Nitroglycerin	0.4	3706021	9916001	9905011	9923001	2017-06-18 19:58:00	N1+2+	9901057	9901057
10692016	7721512	4917	Nitroglycerin	0.4	3706021	9916001	9905013	9923001	2017-11-19 20:51:00	N1+2+	9901055	9901055
11305536	8165453	4917	Nitroglycerin	0.4	3706021	9916001	9905013	7701003	2017-09-13 10:00:48	N1+2+	9901053	9901053
15151739	10865836	4917	Nitroglycerin	0.4	3706021	9916001	9905013	7701003	2017-05-03 18:36:33	N1+2+	9901053	9901053
20151221	13571569	4917	Nitroglycerin	1	3706003	9916001	9905013	9923001	2017-08-27 08:30:00	N1+2+	9901051	9901051
21737115	15269126	4917	Nitroglycerin	1	3706013	9916001	9905007	9923001	2017-04-13 08:08:59	N1+2+	9901051	9901051
4777605	3451554	4917	Nitroglycerin	0.4	3706021	9916001	9905013	9923001	2017-06-02 14:30:00	N1+2+3+	9901053	9901053
9225904	6679237	4917	Nitroglycerin	0.4	3706021	9916001	9905013	9923001	2017-02-10 21:36:28	N1+2+3+	9901053	9901053
9704502	7049999	4917	Nitroglycerin	0.4	3706021	9916001	9905013	9923001	2017-10-26 17:03:00	N1+2+3+	9901051	9901051
10671682	7707870	4917	Nitroglycerin	0.4	3706021	9916001	9905007	9923001	2017-09-03 13:20:00	N1+2+3+	9901051	9901051
16769317	11954742	4917	Nitroglycerin	0.4	3706021	9916001	9905013	9923001	2017-07-24 12:26:00	N1+2+3+	9901051	9901051
20086046	13228700	4917	Nitroglycerin	0.4	3706021	9916001	9905013	9923001	2017-08-14 23:10:00	N1+2+3+	9901051	9901051
21001245	14688355	4917	Nitroglycerin	0.4	3706021	9916001	9905013	9923001	2017-12-07 17:00:00	N1+2+3+	9901053	9901053
16746978	11936665	4917	Nitroglycerin	0.4	3706021	9916003	9905013	7701003	2017-07-24 07:14:38	N1+2030	9901053	9901053
1663773	1288540	1191	Aspirin	182	3706021	9916003	9905013	9923001	2017-01-19 05:02:00	N10	9901053	9901053
9535851	1308375	1191	Aspirin	324	3706021	9916003	7701003	9923001	2017-01-12 13:49:00	N10	9901053	9901053
1801477	1387512	1191	Aspirin	324	3706021	9916003	9905013	9923001	2017-02-06 05:29:00	N10	9901051	9901051
1978279	1464320	1191	Aspirin	324	3706021	9916003	9905007	9923001	2017-02-14 16:04:32	N10	9901053	9901053
2058759	1501683	1191	Aspirin	325	3706021	9916003	9905013	9923001	2017-02-26 13:03:00	N10	9901051	9901051
3753240	1538510	1191	Aspirin	325	3706021	9916003	9905001	9923001	2017-02-20 05:23:00	N10	9901053	9901053
2787439	1995560	1191	Aspirin	324	3706021	9916003	9905013	9923001	2017-03-28 14:35:13	N10	9901053	9901053
3416004	2531716	1191	Aspirin	324	3706021	9916003	9905013	9923001	2017-01-29 03:28:00	N10	9901051	9901051
3431983	2545453	1191	Aspirin	324	3706021	9916003	9905013	9923001	2017-04-12 13:40:00	N10	9901051	9901051
3434873	2548969	1191	Aspirin	324	3706021	9916003	9905013	9923001	2017-04-15 21:47:00	N10	9901053	9901053
3618827	2696134	1191	Aspirin	324	3706021	9916003	9905009	9923001	2017-03-03 21:49:54	N10	9901053	9901053
4014409	3011486	1191	Aspirin	324	3706021	9916003	9905013	9923001	2017-05-05 15:07:00	N10	9901053	9901053
4770245	3594965	1191	Aspirin	324	3706021	9916003	9905007	9923001	2017-06-19 12:32:00	N10	9901053	9901053
4779590	3600167	1191	Aspirin	324	3706021	9916003	7701001	9923001	2017-06-19 10:10:00	N10	9901051	9901051
6418060	3637425	1191	Aspirin	324	3706021	9916003	9905011	9923001	2017-06-14 16:07:00	N10	9901053	9901053
4911428	3670116	1191	Aspirin	324	3706021	9916003	9905007	9923001	2017-06-24 21:47:00	N10	9901051	9901051
7058702	3672552	1191	Aspirin	324	3706021	9916003	9905007	9923003	2017-06-19 09:30:00	N10	9901053	9901053
5025536	3755977	1191	Aspirin	324	3706021	9916003	9905013	9923001	2017-06-15 22:19:00	N10	9901051	9901051
5571382	4187727	1191	Aspirin	324	3706021	9916003	9905013	9923003	2017-01-07 13:27:00	N10	9901051	9901051
5706248	4288959	1191	Aspirin	324	3706021	9916003	9905013	9923001	2017-01-12 04:16:00	N10	9901053	9901053
5740489	4316324	1191	Aspirin	243	3706021	9916003	9905013	9923001	2017-02-01 13:45:00	N10	9901053	9901053
5879197	4428500	1191	Aspirin	324	3706021	9916003	7701001	9923001	2017-07-14 14:13:00	N10	9901053	9901053
6248061	4724147	1191	Aspirin	324	3706021	9916003	9905013	9923001	2017-07-04 10:25:00	N10	9901055	9901055
6249614	4725453	1191	Aspirin	324	3706021	9916003	9905013	9923001	2017-07-02 03:35:00	N10	9901055	9901055
8357042	4802933	1191	Aspirin	324	3706021	9916003	9905013	9923001	2017-06-20 12:54:00	N10	9901051	9901051
6399674	4853698	1191	Aspirin	324	3706021	9916003	9905013	9923001	2017-07-25 11:21:00	N10	9901051	9901051
6436113	4879565	1191	Aspirin	324	3706021	9916003	9905013	9923001	2017-07-24 09:35:00	N10	9901053	9901053
10399914	5034950	1191	Aspirin	325	3706021	9916003	9905007	9923003	2017-08-04 02:06:00	N10	9901053	9901053
6785957	5130398	1191	Aspirin	0	3706021	9916003	9905013	9923001	2017-01-04 09:05:00	N10	9901053	9901053
6885090	5206193	1191	Aspirin	243	3706021	9916003	9905013	9923001	2017-01-03 17:09:00	N10	9901051	9901051
7217777	5447394	1191	Aspirin	324	3706021	9916003	9905013	9923001	2017-08-20 23:40:40	N10	9901055	9901055
7692660	5807666	1191	Aspirin	324	3706021	9916003	9905013	9923001	2017-08-29 20:32:00	N10	9901053	9901053
7876444	5947337	1191	Aspirin	324	3706021	9916003	9905013	9923001	2017-02-17 13:08:00	N10	9901053	9901053
7897977	5964880	1191	Aspirin	324	3706021	9916003	9905013	9923001	2017-07-07 06:45:00	N10	9901053	9901053
8846862	6320062	1191	Aspirin	324	3706021	9916003	9905013	9923001	2017-09-26 13:32:00	N10	9901051	9901051
8797568	6369659	1191	Aspirin	324	3706021	9916003	9905013	9923001	2017-09-26 02:30:00	N10	9901051	9901051
9002613	6516279	1191	Aspirin	324	3706021	9916003	9905013	9923001	2017-02-11 11:16:00	N10	9901053	9901053
9040868	6547963	1191	Aspirin	162	3706021	9916003	9905013	9923001	2017-03-01 15:41:00	N10	9901053	9901053
24081292	6600122	1191	Aspirin	324	3706021	9916003	9905029	9923001	2017-09-29 23:44:00	N10	9901051	9901051
9276756	6723934	1191	Aspirin	324	3706021	9916003	9905013	9923001	2017-03-10 13:53:22	N10	9901051	9901051
9963062	7230400	1191	Aspirin	324	3706021	9916003	7701001	9923001	2017-11-05 17:40:00	N10	9901057	9901057
9983886	7247341	1191	Aspirin	324	3706021	9916003	9905007	9923001	2017-03-24 05:39:00	N10	9901051	9901051
10193478	7401209	1191	Aspirin	324	3706021	9916003	9905013	9923001	2017-10-30 19:00:00	N10	9901051	9901051
10219838	7421891	1191	Aspirin	324	3706021	9916003	9905013	9923003	2017-09-01 15:52:49	N10	9901053	9901053
10459701	7551055	1191	Aspirin	324	3706021	9916003	9905007	9923001	2017-06-19 12:32:00	N10	9901053	9901053
10531160	7607979	1191	Aspirin	325	3706021	9916003	9905013	9923001	2017-11-12 15:01:00	N10	9901053	9901053
10582195	7641811	1191	Aspirin	324	3706021	9916003	9905007	9923001	2017-11-16 21:12:00	N10	9901053	9901053
10597255	7652569	1191	Aspirin	324	3706021	9916003	9905013	9923001	2017-11-01 15:28:00	N10	9901051	9901051
10604461	7657994	1191	Aspirin	324	3706021	9916003	9905007	9923001	2017-11-18 21:14:00	N10	9901053	9901053
11352434	7914222	1191	Aspirin	324	3706021	9916003	9905013	9923001	2017-11-22 10:09:00	N10	9901053	9901053
11015573	7937156	1191	Aspirin	324	3706021	9916003	9905013	9923001	2017-12-03 23:30:00	N10	9901051	9901051
11317450	8175528	1191	Aspirin	324	3706021	9916003	9905013	9923001	2017-10-19 04:11:00	N10	9901055	9901055
14484215	8203504	1191	Aspirin	325	3706021	9916003	9905013	9923001	2017-11-09 17:19:00	N10	9901051	9901051
11485781	8299968	1191	Aspirin	324	3706021	9916003	9905013	9923001	2017-11-14 03:14:00	N10	9901051	9901051
11590586	8364286	1191	Aspirin	324	3706021	9916003	9905013	9923001	2017-12-11 22:01:54	N10	9901053	9901053
11854253	8507393	1191	Aspirin	324	3706021	9916003	9905007	9923001	2017-12-23 15:13:00	N10	9901051	9901051
11931945	8564720	1191	Aspirin	324	3706021	9916003	9905013	9923001	2017-12-19 20:56:45	N10	9901055	9901055
13787880	9866845	1191	Aspirin	324	3706021	9916003	9905013	9923001	2017-11-28 07:16:00	N10	9901053	9901053
16542592	10234422	1191	Aspirin	162	3706021	9916003	9905001	9923001	2017-11-16 05:02:00	N10	9901051	9901051
14474807	10364851	1191	Aspirin	325	3706021	9916003	9905013	9923001	2017-12-19 14:52:00	N10	9901053	9901053
15132103	10848632	1191	Aspirin	326	3706021	9916003	7701001	9923001	2017-05-01 06:11:00	N10	9901053	9901053
15152966	10866871	1191	Aspirin	324	3706021	9916003	9905013	9923001	2017-05-06 02:37:00	N10	9901053	9901053
16000242	11488734	1191	Aspirin	324	3706021	9916003	9905013	9923001	2017-06-11 16:22:00	N10	9901051	9901051
16030852	11515492	1191	Aspirin	324	3706021	9916003	9905013	7701003	2017-06-18 14:36:00	N10	9901051	9901051
16086260	11557075	1191	Aspirin	162	3706021	9916003	9905013	9923001	2017-06-21 06:17:00	N10	9901053	9901053
17957143	12511255	1191	Aspirin	324	3706021	9916003	9905007	9923001	2017-11-16 21:16:00	N10	9901051	9901051
18441393	12854265	1191	Aspirin	325	3706021	9916003	9905007	9923001	2017-01-09 15:09:20	N10	9901051	9901051
18449710	12861526	1191	Aspirin	324	3706021	9916003	9905009	9923001	2017-03-31 11:19:00	N10	9901051	9901051
20092829	13234971	1191	Aspirin	324	3706021	9916003	9905013	9923001	2017-05-03 16:56:00	N10	9901053	9901053
19732601	13872236	1191	Aspirin	324	3706021	9916003	9905007	9923001	2017-12-31 15:15:00	N10	9901053	9901053
20866028	14575017	1191	Aspirin	324	3706021	9916003	9905013	9923001	2017-11-30 10:59:00	N10	9901051	9901051
21027245	14711287	1191	Aspirin	324	3706021	9916003	9905019	9923003	2017-12-11 20:15:00	N10	9901053	9901053
21213642	14860591	1191	Aspirin	325	3706021	9916003	9905007	9923001	2017-09-07 10:05:29	N10	9901055	9901055
21509806	15093993	1191	Aspirin	324	3706021	9916003	9905013	9923001	2017-01-11 16:56:00	N10	9901051	9901051
21678111	15222054	1191	Aspirin	324	3706021	9916003	9905009	9923001	2017-08-23 13:07:57	N10	9901053	9901053
21719654	15255592	1191	Aspirin	324	3706021	9916003	9905007	9923001	2017-01-27 06:39:11	N10	9901051	9901051
21737067	15269092	1191	Aspirin	324	3706021	9916003	9905007	9923001	2017-04-13 01:19:00	N10	9901053	9901053
21989578	15468112	1191	Aspirin	324	3706021	9916003	9905007	9923001	2017-08-30 00:48:00	N10	9901057	9901057
22063817	15523031	1191	Aspirin	324	3706021	9916003	7701003	9923001	2017-06-12 04:26:00	N10	9901051	9901051
22310046	15717327	1191	Aspirin	324	3706021	9916003	9905007	9923001	2017-11-28 06:10:00	N10	9901053	9901053
22311051	15718054	1191	Aspirin	325	3706021	9916003	9905007	9923001	2017-12-01 18:17:11	N10	9901055	9901055
23985703	16982511	1191	Aspirin	324	3706021	9916003	9905013	9923001	2017-02-08 00:46:00	N10	9901053	9901053
24291382	17198785	1191	Aspirin	381	3706021	9916003	9905013	9923001	2017-04-25 20:35:00	N10	9901051	9901051
13728301	1241732	4917	Nitroglycerin	0.4	3706021	9916001	9905011	9923001	2017-01-04 05:08:00	N102+	9901051	9901051
1872914	1396469	4917	Nitroglycerin	0.5	3706003	9916001	9905019	9923003	2017-01-13 23:55:58	N102+	9901051	9901051
2386798	1723506	4917	Nitroglycerin	1	3706003	9916001	9905013	9923001	2017-03-20 17:18:27	N102+	9901053	9901053
8195985	2904771	4917	Nitroglycerin	0.4	3706021	9916001	9905013	9923001	2017-01-25 18:36:46	N102+	9901053	9901053
4178672	3135726	4917	Nitroglycerin	0.4	3706021	9916001	9905007	9923001	2017-05-04 16:50:00	N102+	9901051	9901051
5404202	4052795	4917	Nitroglycerin	400	3706015	9916001	9905013	9923001	2017-07-02 15:36:00	N102+	9901051	9901051
6118542	4249619	4917	Nitroglycerin	1	3706003	9916001	9905013	9923001	2017-07-04 07:56:00	N102+	9901057	9901057
8331090	4780872	4917	Nitroglycerin	0.4	3706021	9916001	9905013	9923001	2017-03-28 00:13:00	N102+	9901053	9901053
10398292	4992943	4917	Nitroglycerin	0.4	3706021	9916001	9905007	9923001	2017-08-02 00:32:00	N102+	9901053	9901053
8295044	6110113	4917	Nitroglycerin	0.4	3706021	9916001	9905013	9923001	2017-09-16 04:53:00	N102+	9901051	9901051
10775027	7778546	4917	Nitroglycerin	1	3706021	9916001	9905013	9923001	2017-11-25 05:39:00	N102+	9901051	9901051
11198448	8081387	4917	Nitroglycerin	0.4	3706021	9916001	9905013	7701003	2017-09-21 15:36:38	N102+	9901055	9901055
12256539	8823603	4917	Nitroglycerin	0.4	3706021	9916001	9905007	9923001	2017-04-24 04:43:00	N102+	9901051	9901051
15649266	11225770	4917	Nitroglycerin	0.4	3706021	9916001	9905013	9923001	2017-03-07 09:40:12	N102+	9901055	9901055
20935730	14630596	4917	Nitroglycerin	1	3706003	9916001	9905013	9923001	2017-11-21 14:51:00	N102+	9901053	9901053
21843593	15349960	4917	Nitroglycerin	0.4	3706021	9916001	7701001	9923001	2017-10-02 14:00:00	N102+	9901053	9901053
1979912	1465425	4917	Nitroglycerin	1	3706001	9916001	9905013	9923001	2017-02-14 15:08:00	N102+3+	9901053	9901053
8938784	6469072	4917	Nitroglycerin	0.4	3706021	9916001	9905007	9923001	2017-09-25 19:27:00	N102+3+	9901051	9901051
9274719	6722149	4917	Nitroglycerin	0.4	3706021	9916001	9905013	9923001	2017-03-10 15:56:34	N102+3+	9901051	9901051
9304617	6748299	4917	Nitroglycerin	0.4	3706021	9916001	9905013	9923001	2017-03-29 22:58:00	N102+3+	9901051	9901051
11828049	8328304	4917	Nitroglycerin	0.4	3706021	9916001	9905007	9923001	2017-01-02 14:07:00	N102+3+	9901051	9901051
13507804	9673194	4917	Nitroglycerin	0.4	3706021	9916001	9905007	9923001	2017-12-12 16:40:00	N102+3+	9901051	9901051
15735208	11286754	4917	Nitroglycerin	0.4	3706021	9916001	9905013	9923001	2017-05-21 09:57:00	N102+3+	9901051	9901051
15919260	11427883	4917	Nitroglycerin	0.4	3706021	9916001	9905013	9923001	2017-06-05 08:50:00	N102+3+	9901055	9901055
22299245	15709096	4917	Nitroglycerin	0.4	3706021	9916001	9905007	9923001	2017-10-20 00:37:13	N102+3+	9901053	9901053
21208749	14857279	4917	Nitroglycerin	0.4	3706021	9916001	9905007	9923001	2017-12-04 09:22:00	N102+3+4+5+	9901051	9901051
4375898	1211773	4917	Nitroglycerin	0.4	3706021	9916001	9905013	9923001	2017-01-11 09:03:00	N102+3+4+5+6+	9901053	9901053
11753710	8450127	4917	Nitroglycerin	0.4	3706021	9916001	9905013	9923001	2017-01-16 11:32:00	N102+3+4+5+6+	9901055	9901055
9691211	7040927	4917	Nitroglycerin	0.4	3706021	9916001	9905029	9923001	2017-08-02 15:30:00	N102+3+405+6+7+	9901057	9901057
15412346	11054829	4917	Nitroglycerin	0.4	3706021	9916003	9905013	9923001	2017-05-10 04:32:00	N102+3+4050	9901053	9901053
4986691	3727817	4917	Nitroglycerin	5	3706037	9916003	9905007	9923001	2017-06-25 00:18:00	N102+30	9901051	9901051
12750526	8363655	4917	Nitroglycerin	1	3706003	9916003	9905013	9923001	2017-12-17 05:23:00	N102+30	9901051	9901051
22314065	15720309	4917	Nitroglycerin	0.4	3706021	9916003	9905007	9923001	2017-12-12 11:29:52	N102+30	9901055	9901055
2055171	1498706	4917	Nitroglycerin	0.4	3706021	9916003	9905007	9923001	2017-02-22 17:46:00	N1020	9901051	9901051
2059675	1502457	4917	Nitroglycerin	0.4	3706021	9916003	7701001	9923001	2017-02-26 05:04:00	N1020	9901051	9901051
3992841	2993635	4917	Nitroglycerin	0.4	3706021	9916003	9905011	9923001	2017-03-24 08:55:19	N1020	9901055	9901055
4184839	3140584	4917	Nitroglycerin	0.4	3706021	9916003	9905013	9923001	2017-05-13 09:01:00	N1020	9901053	9901053
4912257	3670776	4917	Nitroglycerin	5	3706037	9916003	9905007	9923001	2017-06-25 00:18:00	N1020	9901051	9901051
5391904	4042842	4917	Nitroglycerin	0.4	3706021	9916003	9905007	9923001	2017-07-06 15:33:00	N1020	9901051	9901051
6161290	4656276	4917	Nitroglycerin	0.4	3706021	9916003	7701003	9923001	2017-06-05 07:45:00	N1020	9901053	9901053
8336967	4786095	4917	Nitroglycerin	0.4	3706021	9916003	9905013	9923001	2017-01-23 23:51:00	N1020	9901051	9901051
6386613	4843965	4917	Nitroglycerin	0.4	3706021	9916003	9905013	9923001	2017-07-14 17:40:00	N1020	9901051	9901051
6462589	4898226	4917	Nitroglycerin	0.4	3706021	9916003	9905031	9923001	2017-07-20 18:52:57	N1020	9901053	9901053
6811669	5149325	4917	Nitroglycerin	0.4	3706021	9916003	9905013	9923001	2017-08-09 03:30:00	N1020	9901053	9901053
6827880	5162152	4917	Nitroglycerin	0.4	3706021	9916003	9905013	9923001	2017-01-12 02:40:00	N1020	9901055	9901055
8541938	5732849	4917	Nitroglycerin	0.4	3706021	9916003	7701001	9923001	2017-04-01 08:26:00	N1020	9901051	9901051
8899279	6439939	4917	Nitroglycerin	0.4	3706021	9916003	9905011	9923001	2017-06-08 15:37:00	N1020	9901053	9901053
9149939	6629618	4917	Nitroglycerin	0.4	3706021	9916003	7701001	9923001	2017-03-10 13:14:00	N1020	9901051	9901051
9224140	6677853	4917	Nitroglycerin	0.4	3706021	9916003	9905013	9923001	2017-02-23 00:30:16	N1020	9901055	9901055
9967577	7234229	4917	Nitroglycerin	1	3706021	9916003	9905013	9923001	2017-11-06 02:47:00	N1020	9901051	9901051
10466537	7556497	4917	Nitroglycerin	0.4	3706021	9916003	9905007	9923001	2017-07-06 15:33:00	N1020	9901051	9901051
14381477	10318617	4917	Nitroglycerin	0.4	3706021	9916003	9905013	9923001	2017-12-01 22:42:54	N1020	9901055	9901055
15725588	11278300	4917	Nitroglycerin	0.4	3706021	9916003	9905013	9923001	2017-05-21 19:06:00	N1020	9901051	9901051
16622021	11856358	4917	Nitroglycerin	0.4	3706021	9916003	9905013	9923001	2017-07-04 18:00:00	N1020	9901053	9901053
16652145	11924756	4917	Nitroglycerin	4	3706021	9916003	7701001	9923001	2017-07-20 12:24:00	N1020	9901053	9901053
20215838	13628730	4917	Nitroglycerin	0.4	3706021	9916003	9905013	9923001	2017-09-30 23:33:00	N1020	9901053	9901053
20915732	14612575	4917	Nitroglycerin	0.4	3706021	9916003	9905019	9923001	2017-11-16 23:10:00	N1020	9901057	9901057
21669035	15214105	4917	Nitroglycerin	0.4	3706021	9916003	7701003	9923003	2017-07-15 20:50:00	N1020	9901051	9901051
22092590	15546668	4917	Nitroglycerin	0.4	3706021	9916003	9905007	9923001	2017-09-24 01:47:00	N1020	9901053	9901053
22366951	15760767	4917	Nitroglycerin	0.4	3706021	9916003	9905013	9923001	2017-12-02 16:57:00	N1020	9901053	9901053
23910844	16915632	4917	Nitroglycerin	0.4	3706021	9916003	9905007	9923001	2017-07-27 03:13:00	N1020	9901051	9901051
9150455	6630048	4917	Nitroglycerin	4	3706021	9916001	7701001	9923001	2017-03-10 16:20:00	N10203+	9901057	9901057
5226775	3915356	4917	Nitroglycerin	0.4	3706021	9916003	9905013	9923001	2017-06-03 12:27:23	N10203+40	9901053	9901053
5392310	4043166	4917	Nitroglycerin	0.4	3706021	9916003	9905007	9923001	2017-07-06 10:05:00	N102030	9901053	9901053
5455755	4091596	4917	Nitroglycerin	0.4	3706021	9916003	9905007	9923001	2017-04-28 13:57:00	N102030	9901051	9901051
5964600	4503656	4917	Nitroglycerin	0	7701003	9916003	7701003	9923001	2017-03-19 17:32:00	N102030	9901055	9901055
5970736	4508792	4917	Nitroglycerin	0.4	3706021	9916003	9905007	9923001	2017-04-08 03:26:00	N102030	9901053	9901053
8552975	5742149	4917	Nitroglycerin	0.4	3706021	9916003	9905013	9923001	2017-03-26 00:10:00	N102030	9901053	9901053
8728591	6325779	4917	Nitroglycerin	0.4	3706021	9916003	9905013	9923001	2017-01-30 14:33:00	N102030	9901053	9901053
10466529	7556491	4917	Nitroglycerin	0.4	3706021	9916003	9905007	9923001	2017-07-06 10:05:00	N102030	9901053	9901053
10875102	7847112	4917	Nitroglycerin	0.4	3706021	9916003	9905013	9923001	2017-11-28 16:00:00	N102030	9901051	9901051
11026131	7944477	4917	Nitroglycerin	0.4	3706021	9916003	9905013	9923001	2017-11-28 05:55:00	N102030	9901051	9901051
12420335	8934761	4917	Nitroglycerin	0.4	3706021	9916003	9905011	9923001	2017-09-03 19:10:00	N102030	9901053	9901053
16648153	11930826	4917	Nitroglycerin	0.4	3706021	9916003	9905013	9923001	2017-07-21 13:10:00	N102030	9901053	9901053
22091937	15546153	4917	Nitroglycerin	0.4	3706021	9916003	9905007	9923001	2017-09-22 23:37:47	N102030	9901053	9901053
22314303	15720487	4917	Nitroglycerin	0.4	3706021	9916003	9905007	9923001	2017-12-13 11:00:00	N102030	9901051	9901051
21715901	15252601	4917	Nitroglycerin	1	3706013	9916003	9905007	9923001	2017-02-12 10:37:28	N10203040	9901051	9901051
2141923	1551811	4917	Nitroglycerin	0.4	3706021	9916003	7701003	9923001	2017-01-16 20:38:00	N1020304050	9901051	9901051
20152733	13572927	4917	Nitroglycerin	0.4	3706021	9916003	9905013	9923001	2017-09-10 02:02:00	N1020304050	9901051	9901051
3028555	1960303	1191	Aspirin	324	3706021	9916001	9905013	9923001	2017-02-24 11:05:56	N2+	9901051	9901051
4300566	3233808	1191	Aspirin	324	3706021	9916001	9905011	9923001	2017-05-10 09:23:46	N2+	9901057	9901057
6883524	5204901	1191	Aspirin	324	3706021	9916001	9905013	9923001	2017-01-01 01:51:00	N2+	9901051	9901051
20942050	14635963	1191	Aspirin	324	3706021	9916001	9905013	9923001	2017-11-23 10:18:00	N2+	9901055	9901055
18885650	13194689	4917	Nitroglycerin	0.4	3706021	9916001	9905007	9923001	2017-05-28 10:55:04	N2+2+	9901053	9901053
6694396	5067688	4917	Nitroglycerin	0.4	3706021	9916001	9905013	9923001	2017-08-06 18:20:00	N2+2+3+	9901051	9901051
15639148	11217029	4917	Nitroglycerin	0.4	3706021	9916001	9905013	9923001	2017-01-29 15:20:00	N2+2+3+	9901055	9901055
20174468	13592207	4917	Nitroglycerin	0.4	3706021	9916001	9905013	9923001	2017-09-13 06:32:44	N2+2+3+	9901053	9901053
1786076	1375805	1191	Aspirin	324	3706021	9916003	7701001	9923001	2017-02-02 14:09:00	N20	9901053	9901053
4146717	3110022	1191	Aspirin	324	3706021	9916003	9905011	9923001	2017-05-06 14:09:00	N20	9901057	9901057
8385413	4830625	1191	Aspirin	364	3706021	9916003	7701001	9923001	2017-05-27 00:42:00	N20	9901051	9901051
9131543	6614502	1191	Aspirin	162	3706021	9916003	7701003	9923001	2017-09-16 14:50:00	N20	9901053	9901053
9782202	6844718	1191	Aspirin	324	3706021	9916003	9905007	9923001	2017-10-08 13:45:00	N20	9901053	9901053
15756927	11305618	1191	Aspirin	324	3706021	9916003	9905013	9923001	2017-05-28 01:04:00	N20	9901051	9901051
5962330	4501762	4917	Nitroglycerin	0.4	3706021	9916001	9905013	9923001	2017-03-28 02:10:00	N202+	9901053	9901053
9391053	6819350	4917	Nitroglycerin	0.4	3706021	9916001	9905013	9923001	2017-10-13 08:07:00	N202+3+	9901055	9901055
11082746	7370567	4917	Nitroglycerin	0.4	3706021	9916001	9905013	9923001	2017-11-06 11:19:47	N202+304+	9901053	9901053
4193262	3161888	4917	Nitroglycerin	0.4	3706021	9916003	9905013	9923001	2017-05-14 13:20:00	N2020	9901051	9901051
4547705	3294563	4917	Nitroglycerin	0.04	3706021	9916003	9905013	9923001	2017-05-23 03:22:26	N2020	9901055	9901055
8343486	4791255	4917	Nitroglycerin	0.4	3706021	9916003	9905013	9923001	2017-04-23 11:20:00	N2020	9901051	9901051
19959377	14035165	4917	Nitroglycerin	0.4	3706021	9916003	9905007	9923001	2017-11-08 16:06:00	N2020	9901053	9901053
3990539	2991642	4917	Nitroglycerin	0.4	3706021	9916005	9905013	9923001	2017-03-25 13:56:00	N20203-	9901051	9901051
19754852	13127560	4917	Nitroglycerin	0.4	3706021	9916003	9905013	7701003	2017-06-02 03:59:00	N202030	9901051	9901051
22249807	15669059	4917	Nitroglycerin	0.4	3706021	9916003	9905007	9923001	2017-04-22 23:26:00	N202030	9901051	9901051
11271057	8138882	4917	Nitroglycerin	10	3706029	9916001	9905013	9923001	2017-12-06 10:38:00	N2020304+	9901053	9901053
16623869	11845757	4917	Nitroglycerin	0.4	3706021	9916003	7701003	9923001	2017-07-01 21:12:00	N20203040	9901053	9901053
3041207	2204931	1191	Aspirin	324	3706021	9916001	9905013	9923001	2017-04-07 10:48:00	N3+	9901053	9901053
11667027	8412273	1191	Aspirin	324	3706021	9916001	9905013	9923001	2017-12-13 00:59:32	N3+	9901053	9901053
11767097	8459625	1191	Aspirin	324	3706021	9916001	9905011	9923001	2017-12-09 11:41:00	N3+	9901055	9901055
20960999	14653069	1191	Aspirin	324	3706021	9916001	9905013	9923001	2017-11-28 09:34:35	N3+	9901053	9901053
21987129	15466224	1191	Aspirin	324	3706021	9916001	9905007	9923001	2017-08-21 21:20:39	N3+	9901053	9901053
10882919	7565757	4917	Nitroglycerin	0.4	3706021	9916001	9905007	9923001	2017-11-02 03:46:00	N3+2+	9901053	9901053
19806369	13917360	4917	Nitroglycerin	0.4	3706021	9916001	7701003	9923001	2017-10-29 10:05:02	N3+2+	9901051	9901051
8580847	5766308	4917	Nitroglycerin	0.4	3706021	9916003	9905013	9923001	2017-06-09 16:46:00	N3+20	9901053	9901053
3611762	2616118	1191	Aspirin	162	3706021	9916003	7701001	7701001	2017-04-15 21:54:37	N30	9901051	9901051
4375106	3293196	1191	Aspirin	324	3706021	9916003	7701001	9923001	2017-05-23 08:47:18	N30	9901053	9901053
6065946	4584371	1191	Aspirin	324	3706021	9916003	9905009	9923001	2017-05-12 14:40:00	N30	9901053	9901053
7149472	5390308	1191	Aspirin	162	3706021	9916003	9905013	9923001	2017-08-10 02:15:00	N30	9901053	9901053
11331587	8187915	1191	Aspirin	324	3706021	9916003	9905041	9923003	2017-10-26 10:55:00	N30	9901051	9901051
12969267	9328338	1191	Aspirin	324	3706021	9916003	9905007	9923001	2017-12-13 15:48:00	N30	9901053	9901053
21958065	15442428	1191	Aspirin	2	3706029	9916003	9905013	9923001	2017-11-03 06:05:00	N30	9901051	9901051
22090080	15544757	1191	Aspirin	325	3706021	9916003	9905007	9923001	2017-09-17 05:20:00	N30	9901053	9901053
9379802	5624071	4917	Nitroglycerin	25	7701001	9916001	Unknown	9923003	2017-08-30 15:54:24	N302+	9901053	9901053
7726216	5796957	4917	Nitroglycerin	0.4	3706021	9916001	9905013	9923001	2017-08-31 08:20:00	N302+	9901051	9901051
20673008	14431900	4917	Nitroglycerin	0.5	3706021	9916001	9905007	9923001	2017-12-02 14:40:15	N302+	9901053	9901053
20675286	14433742	4917	Nitroglycerin	0.4	3706021	9916001	9905007	9923001	2017-12-16 20:50:38	N302+	9901051	9901051
9400289	6827515	4917	Nitroglycerin	0.4	3706021	9916001	9905013	9923001	2017-10-12 10:24:00	N302+3+	9901053	9901053
9662566	5278119	4917	Nitroglycerin	0.4	3706021	9916001	9905013	9923001	2017-01-15 22:50:00	N302+3+4+	9901053	9901053
10490864	7575292	4917	Nitroglycerin	0.4	3706021	9916003	9905013	9923001	2017-10-07 14:54:00	N3020	9901053	9901053
19668850	13824665	4917	Nitroglycerin	0.4	3706021	9916003	9905007	9923001	2017-09-09 22:26:00	N3020	9901053	9901053
7122151	5359948	1191	Aspirin	325	3706021	9916001	9905013	9923001	2017-08-15 23:15:00	N4+	9901053	9901053
2190385	1593270	4917	Nitroglycerin	0.4	3706021	9916001	9905007	9923001	2017-02-02 16:03:00	N4+2+	9901053	9901053
10279701	7462475	4917	Nitroglycerin	0.4	3706021	9916001	9905007	9923001	2017-02-02 16:03:00	N4+2+	9901053	9901053
1792593	1380816	1191	Aspirin	324	3706021	9916003	9905013	9923001	2017-02-03 17:04:00	N40	9901051	9901051
2707212	1868367	1191	Aspirin	162	3706021	9916003	7701001	9923001	2017-01-27 07:40:00	N40	9901053	9901053
4272755	3211457	1191	Aspirin	324	3706021	9916003	7701003	9923001	2017-05-05 23:22:00	N40	9901053	9901053
5728048	4306525	1191	Aspirin	324	3706021	9916003	9905013	9923001	2017-01-22 00:08:00	N40	9901053	9901053
3738570	2788235	4917	Nitroglycerin	0.4	3706021	9916001	9905011	9923001	2017-04-03 00:15:53	N402+	9901053	9901053
15839535	11371199	4917	Nitroglycerin	0.4	3706021	9916003	9905013	9923001	2017-06-03 09:28:00	N4020	9901051	9901051
3386141	2505145	1191	Aspirin	325	3706021	9916001	9905013	9923001	2017-03-04 03:40:00	N5+	9901051	9901051
7033716	4846339	1191	Aspirin	324	3706021	9916001	9905007	9923003	2017-07-17 16:40:00	N5+	9901053	9901053
6826449	5160880	1191	Aspirin	325	3706021	9916001	9905013	9923001	2017-01-11 03:36:00	N5+	9901051	9901051
10971260	5347632	1191	Aspirin	243	3706021	9916001	9905013	9923001	2017-08-07 22:44:00	N5+	9901051	9901051
10719160	6022735	1191	Aspirin	324	3706021	9916001	9905013	9923001	2017-09-03 21:30:00	N5+	9901053	9901053
8840038	6041825	1191	Aspirin	324	3706021	9916001	7701003	9923001	2017-09-03 10:58:29	N5+	9901051	9901051
11348853	8202870	1191	Aspirin	324	3706021	9916001	9905013	7701003	2017-11-08 16:21:48	N5+	9901051	9901051
19668600	13824481	1191	Aspirin	325	3706021	9916001	9905013	9923001	2017-08-22 13:25:00	N5+	9901053	9901053
22620784	15970688	1191	Aspirin	324	3706021	9916001	9905007	9923001	2017-08-27 01:00:00	N5+	9901053	9901053
5435606	4075918	4917	Nitroglycerin	400	3706015	9916001	9905001	9923001	2017-04-02 14:26:21	N5+2+	9901053	9901053
10641032	7685904	4917	Nitroglycerin	0.4	3706021	9916001	9905013	9923001	2017-08-28 17:03:00	N5+2+	9901053	9901053
11673114	8341959	4917	Nitroglycerin	0.4	3706021	9916001	9905013	9923001	2017-09-15 23:59:00	N5+2+	9901057	9901057
11719709	8444383	4917	Nitroglycerin	0.4	3706021	9916001	9905007	9923001	2017-12-08 07:47:18	N5+2+	9901051	9901051
12266548	8820986	4917	Nitroglycerin	10	7701003	9916001	9905007	9923001	2017-04-08 15:20:00	N5+2+3+	9901051	9901051
4100794	1537955	1191	Aspirin	324	3706021	9916003	9905001	9923001	2017-02-18 23:02:22	N50	9901053	9901053
3941751	2946504	1191	Aspirin	324	3706021	9916003	9905013	9923001	2017-03-01 16:44:00	N50	9901051	9901051
3990466	2991582	1191	Aspirin	324	3706021	9916003	9905013	9923001	2017-03-22 13:00:00	N50	9901051	9901051
6795905	5139033	1191	Aspirin	325	3706021	9916003	9905041	9923003	2017-01-09 00:55:00	N50	9901055	9901055
8157924	5348397	1191	Aspirin	243	3706021	9916003	9905013	9923001	2017-08-05 22:50:25	N50	9901053	9901053
7184903	5419114	1191	Aspirin	324	3706021	9916003	9905013	9923001	2017-02-16 20:39:20	N50	9901055	9901055
7453425	5613967	1191	Aspirin	324	3706021	9916003	7701001	9923001	2017-08-31 19:40:00	N50	9901053	9901053
8570779	5757477	1191	Aspirin	324	3706021	9916003	7701001	9923001	2017-06-22 07:15:00	N50	9901055	9901055
7882315	5952148	1191	Aspirin	324	3706021	9916003	7701001	9923001	2017-03-10 12:49:00	N50	9901051	9901051
8223570	6189052	1191	Aspirin	324	3706021	9916003	9905013	9923001	2017-09-20 19:00:00	N50	9901057	9901057
10433490	6402114	1191	Aspirin	324	3706021	9916003	7701001	9923001	2017-09-28 13:46:00	N50	9901051	9901051
9072233	6573149	1191	Aspirin	324	3706021	9916003	9905013	9923001	2017-10-06 09:30:59	N50	9901053	9901053
9164724	6641001	1191	Aspirin	324	3706021	9916003	9905013	9923001	2017-10-09 20:15:15	N50	9901055	9901055
9241669	6692995	1191	Aspirin	324	3706021	9916003	9905013	9923003	2017-01-11 04:11:47	N50	9901055	9901055
9955533	7223699	1191	Aspirin	324	3706021	9916003	9905013	9923001	2017-10-28 15:33:00	N50	9901053	9901053
10553479	7623370	1191	Aspirin	324	3706021	9916003	7701001	9923001	2017-11-15 01:55:55	N50	9901053	9901053
11756448	8452213	1191	Aspirin	162	3706021	9916003	9905007	9923001	2017-01-20 11:25:00	N50	9901051	9901051
11858834	8510722	1191	Aspirin	324	3706021	9916003	9905007	9923001	2017-12-07 03:41:00	N50	9901053	9901053
13012766	9360701	1191	Aspirin	324	3706021	9916003	7701003	9923001	2017-01-31 16:01:00	N50	9901053	9901053
18891416	13199110	1191	Aspirin	324	3706021	9916003	9905007	9923001	2017-11-16 11:15:45	N50	9901051	9901051
19731885	13871686	1191	Aspirin	324	3706021	9916003	9905001	9923001	2017-12-11 16:29:00	N50	9901051	9901051
20862094	14571798	1191	Aspirin	162	3706021	9916003	9905007	9923001	2017-07-27 22:29:00	N50	9901051	9901051
4484148	3378717	4917	Nitroglycerin	0.4	3706021	9916001	9905007	9923001	2017-05-22 19:24:00	N502+	9901051	9901051
11725551	8375802	4917	Nitroglycerin	0.4	3706021	9916001	9905013	9923001	2017-01-09 11:00:00	N502+	9901053	9901053
11759848	8454664	4917	Nitroglycerin	10	7701003	9916001	9905019	9923003	2017-02-09 20:53:35	N502+	9901051	9901051
20829503	14545984	4917	Nitroglycerin	0.4	3706021	9916001	9905007	9923001	2017-10-15 19:50:29	N502+	9901051	9901051
22556626	15922184	4917	Nitroglycerin	0.4	3706021	9916001	9905013	9923001	2017-10-13 12:29:00	N502+	9901051	9901051
14805274	10624721	4917	Nitroglycerin	0.4	3706021	9916001	9905013	7701003	2017-11-08 12:22:52	N502+3+	9901051	9901051
3034044	2198752	4917	Nitroglycerin	0.4	3706021	9916003	7701003	9923001	2017-04-03 16:29:48	N5020	9901051	9901051
5554014	4173555	4917	Nitroglycerin	0.4	3706021	9916003	9905023	9923003	2017-04-11 23:21:00	N5020	9901051	9901051
15717829	11273218	4917	Nitroglycerin	0.4	3706021	9916003	9905005	9923001	2017-09-25 16:10:00	N5020	9901051	9901051
16652500	11973277	4917	Nitroglycerin	0.4	3706021	9916003	9905013	9923001	2017-08-02 18:14:00	N5020	9901053	9901053
21547273	15121233	4917	Nitroglycerin	0.4	3706021	9916003	9905007	9923001	2017-12-04 19:42:02	N5020	9901051	9901051
22092171	15546339	4917	Nitroglycerin	0.4	3706013	9916003	9905007	9923001	2017-09-25 11:50:28	N5020	9901051	9901051
10902899	7859280	4917	Nitroglycerin	0.4	3706021	9916003	9905007	9923001	2017-11-22 09:56:00	N502030	9901053	9901053
22366981	15760788	4917	Nitroglycerin	0.4	3706021	9916003	9905013	9923001	2017-12-03 22:10:00	N5020304050	9901051	9901051
PcrMedicationKey'	PcrKey'	eMedications_03'	eMedications_03Descr'	eMedications_05'	eMedications_06'	eMedications_07'	eMedications_10'	eMedications_02'	eMedications_01'		#N/A
	350

## Sheet: n4
	9901023	Non-STEMI	Anterior	Ischemia
	9901025	Non-STEMI	Inferior	Ischemia		N-FIRST- 348 total cases
	9901027	Non-STEMI	Lateral	Ischemia		STEMI - 323 cases
	9901029	Non-STEMI	Posterior	Ischemia		STMI 92.8%
	9901030	Non-STEMI	Septal	Ischemia		NON-STEMI - 7.19%
	9901051	STEMI	Anterior	Ischemia
	9901053	STEMI	Inferior	Ischemia
	9901055	STEMI	Lateral	Ischemia
	9901057	STEMI	Posterior	Ischemia
	9901058	STEMI	Septal	Ischemia
