# Supplementary material for: The timing of administering aspirin and nitroglycerin in patients with STEMI ECG changes alter patient outcome
Source: BMC Emerg Med. 2021 Nov 17;21:137. doi: 10.1186/s12873-021-00523-2 (PMC8597308; doi:10.1186/s12873-021-00523-2)
Supplement: Supplementary file 16 — Additional file 16. [file 12873_2021_523_MOESM16_ESM.xlsx]

## Sheet: Sheet1
	PcrKey'	eDisposition_19'	eSituation_13'
A1-	14545261	4219001	2813003
A1+	10254122	4219003	2813003
A1+	11203389	4219001	2813003
A1+	11546993	4219001	2813001
A1+	11550690	4219003	2813003
A1+	1283661	4219003	2813005
A1+	12867192	4219003	2813001
A1+	1340032	4219005	2813005
A1+	13650338	4219005	2813005
A1+	13774142	4219001	2813001
A1+	14668430	4219005	2813003
A1+	14867973	4219003	2813003
A1+	14869276	4219005	2813003
A1+	14977528	4219003	2813003
A1+	15119067	4219001	2813001
A1+	15240561	4219005	2813003
A1+	15274633	4219003	2813003
A1+	15673850	4219005	2813003
A1+	15723091	4219001	2813003
A1+	1580968	4219003	2813003
A1+	1669043	4219005	2813005
A1+	17199179	4219005	2813003
A1+	1868769	4219001	2813001
A1+	2693690	4219003	2813003
A1+	2908979	4219003	2813001
A1+	2964909	4219003	2813003
A1+	3379529	4219003	2813001
A1+	3430073	4219003	2813001
A1+	3793980	4219005	2813003
A1+	4050483	4219005	2813005
A1+	4079463	4219001	2813001
A1+	4484680	4219005	2813003
A1+	4496208	4219003	2813003
A1+	4696149	4219005	2813005
A1+	4721202	4219005	2813003
A1+	4933451	4219005	2813003
A1+	5089693	4219005	2813003
A1+	5130839	4219003	2813003
A1+	5155161	4219005	2813003
A1+	5270380	4219005	2813005
A1+	5279082	4219001	2813001
A1+	5707319	4219001	2813001
A1+	5734668	4219003	2813001
A1+	5737626	4219005	2813003
A1+	5738787	4219003	2813003
A1+	5742859	4219003	2813001
A1+	5750344	4219003	2813001
A1+	5761676	4219005	2813003
A1+	5771405	4219003	2813001
A1+	5958295	4219003	2813003
A1+	5966258	4219001	2813001
A1+	6184270	4219005	2813003
A1+	6383904	4219003	2813003
A1+	6506728	4219001	2813001
A1+	6545646	4219003	2813003
A1+	6674826	4219003	2813003
A1+	6675293	4219001	2813001
A1+	6759337	4219001	2813001
A1+	6828508	4219001	2813001
A1+	7142999	4219005	2813003
A1+	7153623	4219001	2813001
A1+	7161462	4219003	2813003
A1+	7191871	4219005	2813003
A1+	8033725	4219001	2813003
A1+	8035987	4219001	2813001
A1+	8088500	4219005	2813005
A1+	8628832	4219003	2813003
A1+	8931407	4219001	2813001
A1+	8932736	4219003	2813001
A1+	9923045	4219005	2813003
A1+2+	10299746	4219001	2813001
A1+2+	10408083	4219001	2813001
A1+2+	11513819	4219001	2813001
A1+2+	11554704	4219001	2813001
A1+2+	11963111	4219003	2813003
A1+2+	12615175	4219005	2813005
A1+2+	13047186	4219003	2813001
A1+2+	13523204	4219005	2813003
A1+2+	13536162	4219003	2813001
A1+2+	13571313	4219005	2813003
A1+2+	13821998	4219003	2813001
A1+2+	14115914	4219001	2813001
A1+2+	14349779	4219003	2813003
A1+2+	14686587	4219003	2813003
A1+2+	14743400	4219003	2813003
A1+2+	15231797	4219003	2813003
A1+2+	15262700	4219003	2813003
A1+2+	15527792	4219003	2813001
A1+2+	1560832	4219005	2813005
A1+2+	2910525	4219005	2813003
A1+2+	2951217	4219003	2813001
A1+2+	3396034	4219003	2813001
A1+2+	3735027	4219005	2813003
A1+2+	4511117	4219005	2813003
A1+2+	4772248	4219003	2813003
A1+2+	4929773	4219005	2813005
A1+2+	5062134	4219005	2813003
A1+2+	5147395	4219003	2813001
A1+2+	5187345	4219005	2813003
A1+2+	5279822	4219001	2813001
A1+2+	5428381	4219003	2813001
A1+2+	5705805	4219005	2813005
A1+2+	5782987	4219005	2813003
A1+2+	6034661	4219005	2813003
A1+2+	6322323	4219001	2813001
A1+2+	7246746	4219003	2813001
A1+2+	7986926	4219001	2813001
A1+2+	8107222	4219003	2813001
A1+2+	8389369	4219003	2813001
A1+2+3+	10248355	4219001	2813001
A1+2+3+	10315016	4219001	2813001
A1+2+3+	11893907	4219001	2813001
A1+2+3+	11898093	4219003	2813003
A1+2+3+	13321058	4219005	2813003
A1+2+3+	1337300	4219003	2813001
A1+2+3+	13497946	4219003	2813003
A1+2+3+	1411495	4219003	2813001
A1+2+3+	15267652	4219001	2813003
A1+2+3+	2145479	4219003	2813001
A1+2+3+	4068409	4219001	2813001
A1+2+3+	4168707	4219005	2813003
A1+2+3+	4506002	4219003	2813001
A1+2+3+	4783100	4219003	2813001
A1+2+3+	5010764	4219001	2813001
A1+2+3+	5034871	4219001	2813001
A1+2+3+	5056969	4219003	2813001
A1+2+3+	5103166	4219003	2813001
A1+2+3+	5301487	4219005	2813003
A1+2+3+	5361885	4219005	2813005
A1+2+3+	6006138	4219003	2813003
A1+2+3+	7152154	4219001	2813003
A1+2+3+	7728441	4219005	2813005
A1+2+3+	7933064	4219003	2813003
A1+2+3+	8298015	4219001	2813003
A1+2+3+	8565403	4219003	2813003
A1+2+3+	8674407	4219005	2813005
A1+2+3+4+	1868414	4219003	2813001
A1+2+3+4+	5828058	4219005	2813003
A1+2+3+4+	6622278	4219001	2813001
A1+2+30	5137527	4219003	2813003
A1+2+30	5323369	4219003	2813003
A1+20	15266017	4219001	2813001
A1+20	3250203	4219003	2813001
A1+20	5942742	4219005	2813005
A1+20	6923378	4219003	2813001
A1+20	8386540	4219001	2813001
A1+203+	5133943	4219003	2813001
A1+2030	14085095	4219003	2813003
A1+2030	3595177	4219001	2813001
A1+2030	4265758	4219001	2813001
A10	10994301	4219001	2813001
A10	11346525	4219003	2813003
A10	11366151	4219003	2813003
A10	11486258	4219003	2813003
A10	11929758	4219003	2813003
A10	12854713	4219001	2813001
A10	13405005	4219003	2813001
A10	13646262	4219005	2813005
A10	14179982	4219001	2813001
A10	14380213	4219003	2813003
A10	14380417	4219003	2813003
A10	1454557	4219003	2813003
A10	14547339	4219001	2813001
A10	14679914	4219003	2813001
A10	14759526	4219005	2813003
A10	1494999	4219003	2813003
A10	15480056	4219003	2813003
A10	15712139	4219001	2813001
A10	1593204	4219001	2813001
A10	17790288	4219001	2813001
A10	2206015	4219003	2813003
A10	3306220	4219003	2813003
A10	3525049	4219003	2813003
A10	3601952	4219005	2813003
A10	3856018	4219005	2813005
A10	3915447	4219003	2813003
A10	4265604	4219003	2813003
A10	4274257	4219001	2813001
A10	5136608	4219003	2813003
A10	5160864	4219003	2813003
A10	5272448	4219003	2813003
A10	5276871	4219001	2813001
A10	5286321	4219005	2813005
A10	5432255	4219003	2813001
A10	5433255	4219003	2813001
A10	5446833	4219003	2813003
A10	5550423	4219003	2813003
A10	5749691	4219003	2813003
A10	5780326	4219005	2813005
A10	5926160	4219003	2813003
A10	6082772	4219005	2813005
A10	6507083	4219003	2813003
A10	6514419	4219003	2813003
A10	6555975	4219003	2813003
A10	6618585	4219003	2813001
A10	6633575	4219003	2813003
A10	6727005	4219001	2813001
A10	6732758	4219003	2813003
A10	6764504	4219003	2813001
A10	6975268	4219003	2813001
A10	7281482	4219001	2813001
A10	7832700	4219001	2813001
A10	7924210	4219005	2813005
A10	8546122	4219003	2813003
A10	8673154	4219001	2813001
A102-	15267306	4219003	2813003
A102-	8174065	4219001	2813001
A102+	13663140	4219005	2813003
A102+	14247399	4219003	2813003
A102+	14417443	4219003	2813001
A102+	4899680	4219005	2813003
A102+	9257637	4219003	2813003
A102+3+	13647754	4219005	2813003
A102+3+	15706967	4219001	2813001
A102+3+	2564265	4219003	2813001
A102+3+	3407523	4219001	2813001
A102+3+	3671393	4219003	2813003
A102+3+	3863780	4219005	2813003
A102+3+	4069181	4219001	2813001
A102+3+	5006476	4219001	2813001
A102+3+	6576816	4219005	2813003
A102+3+4+	1606857	4219003	2813001
A102+3+40	13496877	4219001	2813003
A1020	10108629	4219005	2813003
A1020	11357608	4219001	2813001
A1020	11892234	4219001	2813001
A1020	11947422	4219001	2813001
A1020	11958264	4219003	2813001
A1020	13127312	4219003	2813003
A1020	1464965	4219005	2813005
A1020	15278018	4219001	2813001
A1020	15717959	4219001	2813001
A1020	1619872	4219003	2813003
A1020	17211134	4219005	2813003
A1020	3860110	4219005	2813005
A1020	4522388	4219001	2813001
A1020	4858086	4219003	2813003
A1020	5023574	4219003	2813001
A1020	5117138	4219005	2813005
A1020	5716351	4219005	2813003
A1020	7153846	4219001	2813001
A1020	7202450	4219005	2813003
A1020	8328993	4219003	2813003
A10203+	10312260	4219003	2813003
A10203+	13247262	4219003	2813003
A10203+	14310112	4219001	2813001
A10203+	4296015	4219003	2813003
A10203+	6084091	4219003	2813003
A10203+4+5060	6627096	4219003	2813001
A102030	11302981	4219003	2813003
A102030	12666464	4219003	2813003
A102030	12893650	4219005	2813005
A102030	13638049	4219001	2813001
A102030	15358747	4219003	2813003
A102030	17204416	4219005	2813005
A102030	2316351	4219001	2813001
A102030	4085107	4219003	2813003
A102030	4720444	4219003	2813003
A102030	5472976	4219003	2813001
A102030	6213687	4219001	2813001
A102030	6922631	4219005	2813005
A102030	8200583	4219003	2813003
A102030	8297703	4219005	2813003
A102030	8384749	4219001	2813001
A102030	8522778	4219003	2813001
A2-	10242456	4219001	2813001
A2-	7625450	4219003	2813003
A2-	8897148	4219005	2813003
A2+	11558955	4219003	2813003
A2+	11864569	4219003	2813003
A2+	1245236	4219003	2813003
A2+	12664109	4219005	2813003
A2+	12930288	4219001	2813001
A2+	13059120	4219001	2813001
A2+	1323756	4219003	2813001
A2+	13567987	4219005	2813003
A2+	1375734	4219003	2813001
A2+	1416455	4219003	2813001
A2+	14349796	4219003	2813003
A2+	14654634	4219005	2813003
A2+	1468293	4219003	2813003
A2+	14694279	4219001	2813001
A2+	14718312	4219005	2813003
A2+	14724670	4219003	2813001
A2+	1499220	4219003	2813003
A2+	15123264	4219001	2813001
A2+	15209525	4219005	2813003
A2+	15270831	4219003	2813003
A2+	1630055	4219001	2813001
A2+	2317085	4219005	2813003
A2+	2901658	4219001	2813001
A2+	3062297	4219005	2813003
A2+	3068652	4219005	2813003
A2+	3073987	4219003	2813003
A2+	3111152	4219005	2813005
A2+	3196933	4219001	2813001
A2+	3459652	4219003	2813005
A2+	4271581	4219001	2813001
A2+	4771794	4219003	2813003
A2+	4861921	4219003	2813003
A2+	4962282	4219005	2813003
A2+	4967751	4219003	2813001
A2+	5424025	4219005	2813005
A2+	5535151	4219003	2813003
A2+	5998630	4219005	2813003
A2+	6132493	4219001	2813001
A2+	6802653	4219001	2813001
A2+	7044833	4219003	2813003
A2+	7122681	4219003	2813003
A2+	7124290	4219003	2813005
A2+	7284438	4219003	2813003
A2+	7478558	4219003	2813001
A2+	7526533	4219005	2813003
A2+	7954160	4219001	2813003
A2+	8032986	4219001	2813001
A2+2+	10304758	4219001	2813001
A2+2+	11208282	4219001	2813001
A2+2+	11900415	4219001	2813001
A2+2+	12859589	4219003	2813001
A2+2+	12870908	4219005	2813003
A2+2+	14547450	4219001	2813001
A2+2+	1501458	4219005	2813005
A2+2+	15262147	4219003	2813003
A2+2+	2074177	4219005	2813003
A2+2+	3594083	4219003	2813003
A2+2+	4359644	4219001	2813003
A2+2+	4776395	4219005	2813003
A2+2+	5237664	4219003	2813001
A2+2+	6523096	4219005	2813003
A2+2+	6540679	4219003	2813003
A2+2+	6698487	4219001	2813001
A2+2+	6745035	4219001	2813001
A2+2+	7120855	4219003	2813003
A2+2+	7484324	4219003	2813001
A2+2+	7631811	4219005	2813003
A2+2+	7649041	4219003	2813001
A2+2+	7965889	4219001	2813001
A2+2+	8105192	4219003	2813003
A2+2+	8107601	4219001	2813003
A2+2+	8392420	4219005	2813005
A2+2+	8941600	4219003	2813001
A2+2+3+	11212431	4219001	2813003
A2+2+3+	11506197	4219003	2813001
A2+2+3+	12544892	4219005	2813005
A2+2+3+	13500321	4219001	2813001
A2+2+3+	13539397	4219003	2813001
A2+2+3+	13586119	4219005	2813003
A2+2+3+	14416845	4219005	2813003
A2+2+3+	17201302	4219005	2813003
A2+2+3+	3211411	4219003	2813003
A2+2+3+	4081992	4219001	2813001
A2+2+3+	4950164	4219001	2813001
A2+2+3+	5542212	4219001	2813001
A2+2+3+	6073921	4219005	2813003
A2+2+3+	6532056	4219001	2813001
A2+2+3+	7038466	4219001	2813003
A2+2+3+	7274121	4219003	2813003
A2+2+3+	8105939	4219003	2813003
A2+2+3+	8173022	4219005	2813005
A2+2+3+4+5+	4307006	4219003	2813001
A2+2+30	13504641	4219001	2813001
A2+2+304+	11427136	4219003	2813003
A2+2+3040	4081036	4219001	2813001
A2+20	11484173	4219001	2813001
A2+20	11889408	4219001	2813001
A2+20	13589369	4219003	2813003
A2+20	15541948	4219001	2813001
A2+20	1716297	4219003	2813001
A2+20	4983614	4219005	2813003
A2+20	5379552	4219003	2813003
A2+2030	14696450	4219003	2813001
A2+2030	1720653	4219001	2813001
A2+2030	3285649	4219005	2813003
A20	10355536	4219003	2813003
A20	10365895	4219003	2813003
A20	10990744	4219003	2813003
A20	11431622	4219005	2813005
A20	11546951	4219003	2813003
A20	11848813	4219001	2813001
A20	11951589	4219003	2813001
A20	12201397	4219003	2813005
A20	1355270	4219001	2813001
A20	14187783	4219003	2813003
A20	14664831	4219005	2813003
A20	15233285	4219003	2813003
A20	15485501	4219003	2813003
A20	16665660	4219003	2813003
A20	2947878	4219001	2813001
A20	3451545	4219003	2813003
A20	3711702	4219005	2813005
A20	3729654	4219001	2813001
A20	3776985	4219001	2813001
A20	4074871	4219001	2813005
A20	4181386	4219001	2813003
A20	4373403	4219001	2813001
A20	5041302	4219003	2813003
A20	5130933	4219001	2813001
A20	5157953	4219005	2813005
A20	5272740	4219003	2813003
A20	5365519	4219001	2813001
A20	5549164	4219005	2813003
A20	5991014	4219001	2813001
A20	5999601	4219001	2813001
A20	6325361	4219003	2813003
A20	6372665	4219003	2813003
A20	6522108	4219003	2813003
A20	6741412	4219003	2813003
A20	6897307	4219003	2813003
A20	7847723	4219003	2813003
A20	9306505	4219001	2813001
A202+	10330530	4219001	2813001
A202+	4154302	4219001	2813001
A202+	5563328	4219003	2813001
A202+	5727022	4219003	2813003
A202+	9668563	4219005	2813003
A202+3+	14868858	4219005	2813003
A202+3+	2779251	4219003	2813003
A202+3+	3555896	4219003	2813003
A202+30	13667554	4219005	2813005
A2020	11962326	4219003	2813003
A2020	13773757	4219001	2813001
A2020	15800372	4219003	2813003
A2020	16126222	4219005	2813003
A2020	2790467	4219001	2813001
A2020	3559978	4219005	2813003
A2020	4067855	4219001	2813001
A2020	4310712	4219001	2813001
A2020	4609388	4219003	2813003
A2020	4725610	4219003	2813001
A2020	5167768	4219001	2813001
A2020	5199315	4219001	2813001
A2020	5248956	4219001	2813001
A2020	5717397	4219001	2813001
A2020	6732393	4219001	2813001
A2020	8548443	4219001	2813001
A20203+	15263533	4219001	2813001
A202030	13528428	4219005	2813003
A202030	1363139	4219001	2813001
A202030	7902695	4219001	2813001
A20203040	13248393	4219005	2813005
A20203040	14738183	4219001	2813001
A20203040	3714728	4219003	2813003
A2020304050607080	5174452	4219001	2813001
A3-	5461250	4219001	2813001
A3+	10238886	4219005	2813005
A3+	11364951	4219001	2813001
A3+	1286663	4219003	2813001
A3+	12877184	4219003	2813001
A3+	1334990	4219003	2813001
A3+	13830188	4219001	2813001
A3+	1406423	4219001	2813001
A3+	14183499	4219001	2813001
A3+	15758395	4219005	2813005
A3+	16125232	4219003	2813001
A3+	2160135	4219001	2813001
A3+	2274680	4219005	2813005
A3+	2783796	4219003	2813005
A3+	3327068	4219005	2813003
A3+	3594948	4219005	2813003
A3+	3693490	4219003	2813001
A3+	4774637	4219005	2813005
A3+	5359221	4219003	2813001
A3+	5972672	4219005	2813003
A3+	6365872	4219005	2813003
A3+	6727518	4219001	2813001
A3+	6828894	4219003	2813001
A3+	7265450	4219005	2813003
A3+	7975017	4219005	2813001
A3+2+	11431462	4219003	2813003
A3+2+	12874976	4219001	2813001
A3+2+	13200827	4219003	2813003
A3+2+	13248697	4219005	2813003
A3+2+	13681952	4219005	2813003
A3+2+	15267101	4219003	2813003
A3+2+	15280059	4219001	2813001
A3+2+	15546826	4219001	2813001
A3+2+	1652505	4219003	2813003
A3+2+	2284225	4219005	2813003
A3+2+	2950360	4219005	2813003
A3+2+	2986712	4219003	2813001
A3+2+	4808311	4219003	2813003
A3+2+	5763314	4219003	2813001
A3+2+	5930226	4219003	2813001
A3+2+	6018350	4219001	2813001
A3+2+	6093099	4219005	2813003
A3+2+	6654006	4219001	2813001
A3+2+	6898751	4219005	2813003
A3+2+	8035388	4219001	2813001
A3+2+	8098944	4219001	2813001
A3+2+3+	13571450	4219005	2813005
A3+2+3+	14547617	4219001	2813003
A3+2+3+	14627534	4219005	2813003
A3+2+3+	15707609	4219003	2813003
A3+2+3+	16538787	4219005	2813003
A3+2+3+	3443471	4219001	2813001
A3+2+3+	4367791	4219005	2813003
A3+2+3+	4521272	4219003	2813003
A3+2+3+	5831591	4219003	2813001
A3+2+3+	6171996	4219001	2813001
A3+2+3+	6382737	4219001	2813001
A3+2+3+	7679559	4219005	2813003
A3+2+3+4+5+	13637819	4219005	2813003
A3+2+3+4+5+	4364631	4219003	2813001
A3+2+30	16793915	4219003	2813001
A3+2+3040	13871772	4219003	2813003
A3+20	8313724	4219005	2813005
A30	11421890	4219001	2813001
A30	12862940	4219003	2813003
A30	12921624	4219003	2813003
A30	13828664	4219001	2813001
A30	14064513	4219005	2813005
A30	14075659	4219001	2813001
A30	14639764	4219005	2813005
A30	15258564	4219001	2813001
A30	15275017	4219001	2813001
A30	15673101	4219001	2813001
A30	16791427	4219005	2813003
A30	1863563	4219001	2813001
A30	3228862	4219001	2813001
A30	4775195	4219001	2813001
A30	4810913	4219005	2813005
A30	5363487	4219005	2813005
A30	5435970	4219003	2813003
A30	5933553	4219001	2813001
A30	5993395	4219003	2813001
A30	6104338	4219003	2813003
A30	6190054	4219001	2813001
A30	6534303	4219003	2813003
A30	7509682	4219005	2813003
A30	8016735	4219003	2813005
A30	8509526	4219001	2813001
A302+	2780925	4219001	2813001
A302+	3887760	4219003	2813001
A302+	5434246	4219003	2813001
A302+	5769183	4219003	2813001
A302+	6173301	4219005	2813003
A302+	8500162	4219001	2813001
A302+3+	6269566	4219001	2813001
A302+3+4+5+6+	2752334	4219003	2813003
A302+30	7073474	4219001	2813001
A302+3040	13613036	4219001	2813001
A3020	1249832	4219001	2813001
A3020	13890609	4219001	2813001
A3020	14070789	4219001	2813001
A3020	15716839	4219001	2813003
A3020	16796747	4219001	2813001
A3020	4234999	4219003	2813003
A3020	4874313	4219003	2813003
A3020	5169291	4219003	2813005
A3020	5199478	4219001	2813001
A3020	5286061	4219001	2813001
A3020	5757010	4219001	2813001
A3020	5858144	4219001	2813001
A3020	7245148	4219005	2813005
A30203+	15369994	4219003	2813003
A30203+	16125048	4219005	2813003
A30203+	4214365	4219003	2813001
A30203+	6426395	4219003	2813001
A302030	12205697	4219001	2813003
A302030	15724371	4219001	2813001
A302030	3732693	4219001	2813001
A302030	5534197	4219001	2813001
A302030	6365612	4219003	2813003
A3020304+	5464744	4219003	2813003
A4+	11857569	4219003	2813003
A4+	1333764	4219003	2813001
A4+	1350554	4219005	2813003
A4+	13533922	4219005	2813003
A4+	14621372	4219001	2813001
A4+	14658669	4219005	2813005
A4+	14672245	4219003	2813003
A4+	14706731	4219003	2813001
A4+	1541202	4219001	2813001
A4+	15714365	4219001	2813003
A4+	1612008	4219003	2813003
A4+	1719845	4219005	2813003
A4+	17791312	4219001	2813001
A4+	2545398	4219003	2813003
A4+	2758718	4219003	2813003
A4+	3078545	4219005	2813003
A4+	4271150	4219001	2813001
A4+	4728118	4219003	2813001
A4+	5106784	4219005	2813003
A4+	5120684	4219005	2813003
A4+	5484367	4219003	2813001
A4+	5708624	4219005	2813003
A4+	5939898	4219003	2813003
A4+	5971515	4219003	2813001
A4+	6075136	4219005	2813003
A4+	6130463	4219003	2813001
A4+	6481095	4219005	2813003
A4+	6750726	4219001	2813003
A4+	7075424	4219003	2813005
A4+	7801387	4219003	2813001
A4+	7832595	4219005	2813005
A4+	8067554	4219003	2813003
A4+	8106692	4219001	2813003
A4+	8552573	4219003	2813003
A4+2+	11200890	4219001	2813003
A4+2+	13584628	4219003	2813003
A4+2+	14077475	4219001	2813001
A4+2+	14355887	4219003	2813003
A4+2+	15549586	4219003	2813001
A4+2+	1596349	4219005	2813005
A4+2+	2834626	4219005	2813003
A4+2+	3559911	4219001	2813001
A4+2+	4727778	4219005	2813003
A4+2+	4794965	4219005	2813003
A4+2+	5256042	4219003	2813001
A4+2+	5765593	4219003	2813001
A4+2+	5962359	4219001	2813001
A4+2+	6117598	4219003	2813001
A4+2+	6513669	4219003	2813003
A4+2+	7629378	4219001	2813001
A4+2+	7683506	4219003	2813001
A4+2+	8453005	4219001	2813001
A4+2+	8586918	4219005	2813003
A4+2+	8674533	4219003	2813001
A4+2+3+	11212402	4219001	2813001
A4+2+3+	11369606	4219001	2813001
A4+2+3+	11886991	4219003	2813003
A4+2+3+	14734892	4219005	2813003
A4+2+3+	1668513	4219001	2813001
A4+2+3+	3532963	4219003	2813001
A4+2+3+	3774902	4219003	2813001
A4+2+3+	4235277	4219005	2813003
A4+2+3+	4721192	4219001	2813001
A4+2+3+	6417493	4219005	2813003
A4+2+3+	6510893	4219001	2813001
A4+2+3+40	6831610	4219005	2813003
A4+2+30	5286077	4219003	2813003
A4+20	4075064	4219001	2813003
A4+20	4527771	4219003	2813001
A4+20	4542689	4219001	2813001
A4+203+4+	5164412	4219003	2813003
A40	10073577	4219003	2813003
A40	11510652	4219001	2813001
A40	12873868	4219005	2813005
A40	13204957	4219005	2813005
A40	13571312	4219003	2813003
A40	1416213	4219001	2813001
A40	1469027	4219001	2813001
A40	14973362	4219005	2813003
A40	1542085	4219001	2813001
A40	1667557	4219005	2813003
A40	3376762	4219003	2813003
A40	3914923	4219005	2813003
A40	4642387	4219005	2813005
A40	5103655	4219003	2813001
A40	5306404	4219001	2813001
A40	6086123	4219001	2813001
A40	6429585	4219003	2813001
A40	8199715	4219001	2813001
A40	8528361	4219003	2813003
A40	9310909	4219003	2813003
A402+	1251465	4219005	2813003
A4020	10991183	4219001	2813001
A4020	12888680	4219003	2813003
A4020	1351243	4219001	2813001
A4020	15459524	4219003	2813003
A4020	2792659	4219001	2813001
A4020	3105656	4219001	2813001
A4020	3111035	4219003	2813003
A4020	4142805	4219003	2813003
A4020	4225606	4219001	2813001
A4020	4231103	4219005	2813005
A4020	4829510	4219003	2813003
A4020	5109496	4219003	2813003
A4020	5178492	4219001	2813001
A4020	5777717	4219001	2813001
A4020	5990007	4219001	2813001
A4020	7810155	4219003	2813001
A4020	7811345	4219001	2813001
A4020	7869805	4219003	2813003
A4020	9701749	4219001	2813001
A4020	9913558	4219003	2813003
A40203+	11528302	4219001	2813001
A402030	13533146	4219003	2813001
A402030	14314942	4219001	2813001
A402030	1464643	4219001	2813001
A402030	1693616	4219003	2813001
A402030	3633700	4219005	2813005
A402030	4235273	4219003	2813001
A402030	5146062	4219001	2813003
A402030	5453397	4219003	2813003
A5-	15263918	4219001	2813001
A5-	5765257	4219003	2813001
A5+	10328679	4219003	2813003
A5+	1493696	4219005	2813003
A5+	15272184	4219001	2813001
A5+	15459800	4219001	2813001
A5+	15491401	4219005	2813005
A5+	1926414	4219005	2813003
A5+	3273236	4219001	2813001
A5+	3283143	4219005	2813003
A5+	3515006	4219005	2813003
A5+	3889920	4219005	2813003
A5+	4159786	4219005	2813005
A5+	4644340	4219005	2813003
A5+	4861182	4219003	2813001
A5+	5096891	4219001	2813001
A5+	5099719	4219003	2813003
A5+	5539576	4219003	2813003
A5+	5573870	4219003	2813003
A5+	5960894	4219001	2813001
A5+	5967854	4219005	2813005
A5+	6529740	4219001	2813001
A5+	6552140	4219003	2813003
A5+	6681417	4219003	2813003
A5+	6922588	4219003	2813003
A5+	7083547	4219003	2813003
A5+	7686208	4219003	2813001
A5+	7800350	4219003	2813001
A5+	8161818	4219001	2813001
A5+	8947105	4219005	2813003
A5+2+	11220430	4219003	2813003
A5+2+	12858207	4219003	2813003
A5+2+	14248505	4219003	2813001
A5+2+	15119038	4219001	2813001
A5+2+	15968949	4219005	2813003
A5+2+	16788481	4219005	2813005
A5+2+	1778886	4219005	2813005
A5+2+	2056417	4219003	2813003
A5+2+	3430712	4219003	2813001
A5+2+	3781071	4219005	2813003
A5+2+	4068162	4219001	2813001
A5+2+	4073634	4219001	2813001
A5+2+	4370246	4219005	2813003
A5+2+	5001133	4219005	2813003
A5+2+	5002092	4219005	2813005
A5+2+	5131275	4219001	2813001
A5+2+	5756229	4219003	2813001
A5+2+	5951506	4219001	2813001
A5+2+	5962798	4219005	2813003
A5+2+	6944409	4219001	2813001
A5+2+3+	15446767	4219005	2813003
A5+2+3+	4585114	4219003	2813003
A5+2+3+	5204352	4219003	2813001
A5+2+3+	5930950	4219003	2813001
A5+2+3+	7077804	4219001	2813003
A5+2+3+	8313288	4219005	2813003
A5+20	5776091	4219003	2813001
A50	10847674	4219001	2813001
A50	11270885	4219001	2813001
A50	1273062	4219001	2813001
A50	1325285	4219001	2813001
A50	1490821	4219005	2813003
A50	15446097	4219001	2813003
A50	15462210	4219003	2813003
A50	15464778	4219001	2813001
A50	2563883	4219005	2813005
A50	2765627	4219001	2813001
A50	2776434	4219003	2813003
A50	4165792	4219005	2813005
A50	4585206	4219005	2813003
A50	5115314	4219003	2813003
A50	5388943	4219005	2813005
A50	5411278	4219001	2813001
A50	5495122	4219003	2813003
A50	5781093	4219003	2813003
A50	5783477	4219001	2813001
A50	6165451	4219001	2813001
A50	6758740	4219001	2813001
A50	7138952	4219001	2813001
A50	7963017	4219003	2813003
A50	8356448	4219001	2813001
A5020	3073471	4219003	2813003
A5020	3774924	4219001	2813001
A5020	4182931	4219005	2813003
A5020	4869957	4219003	2813003
A5020	5600271	4219005	2813003
A5020	9316517	4219001	2813001
A50203+	1265676	4219005	2813005
A502030	1252903	4219003	2813001
A502030	13329889	4219005	2813005
A502030	1426573	4219003	2813001
A502030	14696807	4219005	2813003
A502030	15195146	4219003	2813003
A50203040	14684396	4219003	2813003
A5020304050607080	8095583	4219001	2813001
A6-	2958675	4219001	2813001
A6-	3140478	4219001	2813003
A6+	11055359	4219001	2813001
A6+	1265531	4219001	2813001
A6+	13128333	4219003	2813003
A6+	13500381	4219001	2813003
A6+	14312005	4219003	2813001
A6+	14326924	4219001	2813001
A6+	15446710	4219005	2813003
A6+	15465778	4219001	2813001
A6+	15542716	4219001	2813001
A6+	15673773	4219001	2813001
A6+	1669989	4219003	2813003
A6+	1711917	4219003	2813001
A6+	17201507	4219003	2813003
A6+	17451707	4219005	2813005
A6+	1930631	4219005	2813005
A6+	2199536	4219003	2813001
A6+	2952267	4219005	2813003
A6+	2957584	4219003	2813003
A6+	4808625	4219005	2813003
A6+	5256227	4219005	2813001
A6+	5373042	4219001	2813001
A6+	5531759	4219003	2813001
A6+	5774294	4219003	2813003
A6+	5778726	4219003	2813001
A6+	5862419	4219005	2813003
A6+	5930857	4219005	2813005
A6+	6242383	4219003	2813005
A6+	6425872	4219005	2813005
A6+	7121849	4219003	2813005
A6+	7127715	4219003	2813003
A6+	8069063	4219001	2813001
A6+	8075657	4219003	2813005
A6+	8391081	4219003	2813001
A6+	8455406	4219005	2813003
A6+2+	10347698	4219001	2813001
A6+2+	11366450	4219003	2813003
A6+2+	11427497	4219003	2813003
A6+2+	1367758	4219005	2813003
A6+2+	15265893	4219003	2813003
A6+2+	1576071	4219003	2813001
A6+2+	1611469	4219005	2813003
A6+2+	2013867	4219005	2813003
A6+2+	4084174	4219001	2813001
A6+2+	4150157	4219001	2813001
A6+2+	4160748	4219005	2813003
A6+2+	4689889	4219005	2813003
A6+2+	4791738	4219003	2813001
A6+2+	5392870	4219005	2813003
A6+2+	5452107	4219003	2813001
A6+2+	5786468	4219003	2813001
A6+2+	6003590	4219003	2813003
A6+2+	6831688	4219005	2813003
A6+2+	7078271	4219001	2813003
A6+2+	8102726	4219001	2813001
A6+2+	8216326	4219005	2813003
A6+2+3+	13551739	4219003	2813001
A6+2+3+	14064536	4219001	2813003
A6+2+3+	14353230	4219005	2813003
A6+2+3+	15278774	4219001	2813001
A6+2+3+	17210419	4219001	2813001
A6+2+3+	2883717	4219001	2813001
A6+2+3+	4886858	4219005	2813003
A6+2+3+	5121045	4219003	2813001
A6+2+3+	7720743	4219005	2813005
A6+2+3+	8034031	4219001	2813001
A6+2+3+4+	4156644	4219005	2813003
A6+20	13127614	4219001	2813001
A6+20	1341023	4219003	2813003
A6+20	5253931	4219001	2813001
A6+20	6552358	4219003	2813003
A6+20	7941416	4219001	2813001
A6+20	8051372	4219001	2813001
A60	10323585	4219001	2813001
A60	10847432	4219001	2813003
A60	11955730	4219001	2813001
A60	13583031	4219003	2813001
A60	13632400	4219005	2813003
A60	13830804	4219001	2813001
A60	14361407	4219003	2813003
A60	14553714	4219001	2813001
A60	15720796	4219001	2813001
A60	17207057	4219001	2813001
A60	2777331	4219005	2813005
A60	2992012	4219003	2813003
A60	4092919	4219001	2813001
A60	4273334	4219003	2813003
A60	4790792	4219005	2813005
A60	4796200	4219003	2813003
A60	5096477	4219001	2813001
A60	5381380	4219001	2813001
A60	5544369	4219003	2813003
A60	5735393	4219001	2813001
A60	5952122	4219001	2813001
A60	6418704	4219003	2813003
A60	6933161	4219003	2813003
A602+	13306327	4219003	2813003
A6020	1244155	4219003	2813003
A6020	14080629	4219001	2813003
A6020	14307434	4219001	2813001
A6020	15119136	4219001	2813001
A6020	15716477	4219001	2813001
A6020	1653633	4219001	2813001
A6020	1896052	4219003	2813001
A6020	3532957	4219001	2813001
A6020	4076318	4219003	2813001
A6020	4176765	4219005	2813005
A6020	5714644	4219001	2813001
A6020	8294226	4219003	2813001
A6020	8430319	4219003	2813003
A60203+	1710375	4219003	2813003
A60203+	7477659	4219003	2813001
A60203+40	13607044	4219005	2813005
A602030	15459145	4219003	2813003
A602030	2199126	4219003	2813003
A602030	3856581	4219001	2813001
A602030	5508572	4219001	2813001
A602030	6575700	4219001	2813001
A602030	8468503	4219001	2813001
A602-3+	5224119	4219005	2813003
A7-	5199178	4219003	2813003
A7-	8052059	4219001	2813001
A7+	10335705	4219003	2813003
A7+	10336051	4219005	2813005
A7+	11309304	4219001	2813003
A7+	11366212	4219003	2813001
A7+	1257820	4219003	2813001
A7+	13208354	4219005	2813003
A7+	14164144	4219003	2813001
A7+	15710012	4219001	2813001
A7+	1645514	4219003	2813001
A7+	1689245	4219003	2813001
A7+	3506810	4219003	2813001
A7+	3646834	4219003	2813001
A7+	3670109	4219003	2813003
A7+	4173736	4219005	2813005
A7+	4909510	4219003	2813001
A7+	5006585	4219005	2813003
A7+	5019166	4219003	2813001
A7+	5347561	4219001	2813001
A7+	5498535	4219005	2813003
A7+	5533676	4219003	2813003
A7+	5738576	4219003	2813001
A7+	5937078	4219003	2813001
A7+	6950497	4219005	2813003
A7+	7701093	4219001	2813001
A7+	7704760	4219001	2813001
A7+	7799985	4219005	2813003
A7+	8102320	4219003	2813003
A7+	9732276	4219003	2813001
A7+2+	16666205	4219001	2813001
A7+2+	1722810	4219003	2813001
A7+2+	2272107	4219005	2813003
A7+2+	4970389	4219003	2813001
A7+2+	4994687	4219001	2813001
A7+2+	5611674	4219005	2813003
A7+2+	6179049	4219005	2813003
A7+2+	6242470	4219005	2813003
A7+2+	6635521	4219003	2813003
A7+2+	6845676	4219003	2813001
A7+2+	7044436	4219001	2813001
A7+2+	7253487	4219005	2813003
A7+2+	8391620	4219003	2813001
A7+2+3+	14417309	4219005	2813003
A7+2+3+	2201993	4219005	2813003
A7+2+3+	3890118	4219003	2813001
A7+2+3+	4505445	4219005	2813003
A70	14181912	4219005	2813003
A70	14182367	4219005	2813003
A70	1575678	4219001	2813001
A70	2992743	4219003	2813003
A70	3010947	4219003	2813003
A70	3891759	4219001	2813001
A70	4228934	4219003	2813003
A70	4986084	4219003	2813003
A70	6361286	4219001	2813001
A70	6529569	4219003	2813001
A70	7030546	4219003	2813003
A70	7429813	4219003	2813001
A70	8072910	4219003	2813001
A702+	2791478	4219003	2813001
A702+30	3726029	4219003	2813003
A7020	1345136	4219001	2813001
A7020	14330209	4219003	2813001
A7020	2195365	4219003	2813003
A7020	6165421	4219001	2813001
A70203+	4313552	4219005	2813003
A702030	10849633	4219003	2813003
A702030	13868020	4219003	2813003
A702030	15194283	4219001	2813001
A702030	1605575	4219001	2813001
A702030	3785252	4219005	2813005
A70203040	14662976	4219003	2813003
A8-	5090782	4219001	2813001
A8+	11613864	4219003	2813003
A8+	11932259	4219001	2813001
A8+	11936319	4219003	2813005
A8+	11972798	4219001	2813001
A8+	1376447	4219001	2813001
A8+	14059818	4219003	2813003
A8+	14736575	4219005	2813003
A8+	1521998	4219005	2813005
A8+	1592941	4219003	2813001
A8+	1665906	4219005	2813003
A8+	1928992	4219001	2813001
A8+	2015432	4219003	2813001
A8+	2557582	4219003	2813003
A8+	2687805	4219003	2813003
A8+	2782763	4219005	2813003
A8+	2903333	4219003	2813001
A8+	3056246	4219005	2813003
A8+	4807505	4219003	2813003
A8+	5165750	4219001	2813001
A8+	5179383	4219001	2813001
A8+	5478186	4219003	2813001
A8+	5608505	4219003	2813003
A8+	5729122	4219005	2813005
A8+	5744288	4219003	2813001
A8+	5965182	4219003	2813001
A8+	6191683	4219003	2813003
A8+	6802031	4219003	2813003
A8+	7501566	4219003	2813001
A8+	7820777	4219001	2813003
A8+	7920030	4219003	2813001
A8+	8200283	4219003	2813003
A8+2+	10065933	4219001	2813005
A8+2+	11275184	4219001	2813001
A8+2+	12860367	4219001	2813001
A8+2+	13235031	4219003	2813003
A8+2+	1356279	4219003	2813001
A8+2+	13652123	4219005	2813003
A8+2+	1380643	4219003	2813001
A8+2+	13887569	4219003	2813003
A8+2+	1568610	4219003	2813003
A8+2+	4829492	4219005	2813005
A8+2+	5949004	4219005	2813005
A8+2+	6183424	4219003	2813003
A8+2+	6412014	4219001	2813001
A8+2+	6578706	4219003	2813003
A8+2+	8086290	4219001	2813001
A8+2+	8214033	4219005	2813003
A8+2+	8488778	4219003	2813001
A8+2+3+	1273733	4219005	2813003
A8+2+3+	13212709	4219003	2813001
A8+2+3+	13641556	4219003	2813001
A8+2+3+	14712887	4219005	2813003
A8+2+3+	15674103	4219003	2813001
A8+2+3+	2891441	4219005	2813003
A8+2+3+	6087680	4219003	2813001
A8+2+3+4+	1392462	4219003	2813001
A8+20	3111519	4219001	2813001
A8+20	7932235	4219001	2813001
A8+2030	1314498	4219005	2813003
A8+2030	1315577	4219005	2813003
A8+2030	2734033	4219005	2813005
A80	1271911	4219003	2813001
A80	13207684	4219003	2813003
A80	13639342	4219003	2813003
A80	14368611	4219003	2813003
A80	15368445	4219001	2813001
A80	1611157	4219003	2813003
A80	1926856	4219003	2813003
A80	2159881	4219003	2813003
A80	2779074	4219001	2813001
A80	3055645	4219001	2813001
A80	3731234	4219003	2813003
A80	3754386	4219001	2813001
A80	4155416	4219001	2813001
A80	4200296	4219001	2813001
A80	5015495	4219001	2813001
A80	5093519	4219001	2813001
A80	5177321	4219003	2813003
A80	5786862	4219005	2813005
A80	6387736	4219003	2813003
A80	6503621	4219001	2813001
A80	6516427	4219003	2813003
A80	8179711	4219001	2813003
A802+	2015417	4219005	2813005
A802+3+	7649445	4219001	2813001
A802+30	5534697	4219003	2813001
A8020	1285559	4219005	2813005
A8020	13495459	4219001	2813003
A8020	14057809	4219001	2813001
A8020	1575913	4219001	2813001
A8020	1576336	4219005	2813003
A8020	2551574	4219003	2813003
A8020	2944483	4219005	2813005
A8020	5094925	4219003	2813003
A8020	5167031	4219001	2813001
A802030	1399631	4219001	2813001
A802030	3404768	4219003	2813003
A802030	4197091	4219001	2813001
A802030	6460239	4219003	2813001
A802030	8147371	4219005	2813003
A9-	17203930	4219005	2813003
A9-	5748409	4219003	2813003
A9-	6380176	4219005	2813003
A9+	10631170	4219001	2813003
A9+	10855820	4219003	2813003
A9+	11685478	4219001	2813001
A9+	11955889	4219003	2813003
A9+	12668125	4219003	2813003
A9+	1291040	4219001	2813001
A9+	13112158	4219003	2813003
A9+	13206598	4219001	2813001
A9+	13534868	4219001	2813001
A9+	13775862	4219003	2813003
A9+	13776107	4219001	2813001
A9+	14734479	4219003	2813003
A9+	15084953	4219005	2813005
A9+	15488163	4219005	2813003
A9+	1577559	4219003	2813001
A9+	16916087	4219003	2813001
A9+	17646919	4219001	2813003
A9+	1780760	4219005	2813003
A9+	1783799	4219001	2813001
A9+	2228360	4219005	2813003
A9+	2324442	4219001	2813001
A9+	2559153	4219003	2813001
A9+	2560677	4219003	2813001
A9+	3005500	4219005	2813003
A9+	3387733	4219001	2813001
A9+	3406631	4219001	2813001
A9+	3517281	4219005	2813005
A9+	3912947	4219003	2813003
A9+	4155115	4219005	2813005
A9+	4159251	4219005	2813005
A9+	4167538	4219003	2813001
A9+	4171371	4219005	2813005
A9+	4798360	4219003	2813003
A9+	5038180	4219005	2813005
A9+	5082066	4219001	2813001
A9+	5098786	4219003	2813001
A9+	5120640	4219005	2813003
A9+	5200860	4219003	2813003
A9+	5203152	4219001	2813001
A9+	5235536	4219005	2813003
A9+	5244551	4219001	2813003
A9+	5262591	4219003	2813005
A9+	5569653	4219003	2813003
A9+	5582984	4219003	2813003
A9+	5717896	4219005	2813003
A9+	5720132	4219001	2813001
A9+	5726135	4219005	2813005
A9+	5792577	4219005	2813005
A9+	5969328	4219005	2813005
A9+	6265028	4219005	2813003
A9+	6625280	4219003	2813003
A9+	6626515	4219003	2813003
A9+	6671784	4219003	2813003
A9+	6738168	4219001	2813003
A9+	6845813	4219001	2813001
A9+	7022571	4219005	2813005
A9+	7077418	4219003	2813003
A9+	7120493	4219001	2813003
A9+	7127956	4219003	2813003
A9+	7152073	4219003	2813003
A9+	7152340	4219001	2813001
A9+	7274816	4219005	2813003
A9+	7638690	4219003	2813003
A9+	9316607	4219001	2813001
A9+2+	10267454	4219005	2813003
A9+2+	10847804	4219003	2813003
A9+2+	11993439	4219001	2813001
A9+2+	12207327	4219003	2813003
A9+2+	1233781	4219001	2813001
A9+2+	13570923	4219005	2813003
A9+2+	13775977	4219003	2813003
A9+2+	14386601	4219003	2813003
A9+2+	1452877	4219001	2813001
A9+2+	14722428	4219001	2813003
A9+2+	15269497	4219001	2813001
A9+2+	15972289	4219005	2813003
A9+2+	1611271	4219003	2813001
A9+2+	2987409	4219003	2813003
A9+2+	3458752	4219005	2813003
A9+2+	3459161	4219003	2813001
A9+2+	4044963	4219003	2813001
A9+2+	4083033	4219003	2813001
A9+2+	4589720	4219003	2813001
A9+2+	4795514	4219005	2813003
A9+2+	4808635	4219001	2813001
A9+2+	4828713	4219005	2813005
A9+2+	4832601	4219003	2813001
A9+2+	5814284	4219005	2813003
A9+2+	5958620	4219005	2813003
A9+2+	6124036	4219005	2813003
A9+2+	6148235	4219003	2813003
A9+2+	6399660	4219003	2813001
A9+2+	7075933	4219003	2813001
A9+2+	7847725	4219003	2813003
A9+2+	8069962	4219003	2813003
A9+2+	8214894	4219005	2813005
A9+2+	8364024	4219003	2813003
A9+2+3+	15970180	4219005	2813003
A9+2+3+	1620988	4219003	2813003
A9+2+3+	4047812	4219003	2813001
A9+2+3+	4590935	4219005	2813005
A9+2+3+	4807371	4219005	2813003
A9+2+3+	4809774	4219003	2813001
A9+2+3+	5238639	4219005	2813003
A9+2+3+	8211242	4219005	2813005
A9+2+3+	8663646	4219003	2813001
A9+2+3+4+5+	10358122	4219003	2813003
A9+2+3+4+5+6+	17203287	4219005	2813005
A9+2+3+40	8526328	4219003	2813003
A9+2+30	5723393	4219003	2813001
A9+20	3184733	4219003	2813001
A9+20	4644420	4219001	2813001
A9+20	8346308	4219001	2813001
A9+2030	8460839	4219003	2813001
A90	10856539	4219001	2813003
A90	11547036	4219001	2813001
A90	11593532	4219005	2813005
A90	11927312	4219003	2813003
A90	11965894	4219003	2813003
A90	13582146	4219001	2813001
A90	13656029	4219003	2813003
A90	14387167	4219001	2813001
A90	14638203	4219003	2813003
A90	14684415	4219003	2813003
A90	1575629	4219001	2813001
A90	15796691	4219003	2813003
A90	2159361	4219003	2813003
A90	2195600	4219003	2813003
A90	2902334	4219005	2813003
A90	2945555	4219003	2813005
A90	2992936	4219005	2813005
A90	3239612	4219001	2813001
A90	3546267	4219005	2813003
A90	3636915	4219003	2813001
A90	3647895	4219003	2813003
A90	3694051	4219001	2813001
A90	3714871	4219005	2813003
A90	4080234	4219001	2813001
A90	4824652	4219005	2813005
A90	4973471	4219003	2813003
A90	5014615	4219003	2813003
A90	5191359	4219001	2813001
A90	5323973	4219001	2813001
A90	5600134	4219001	2813001
A90	6454721	4219003	2813003
A90	7368553	4219005	2813005
A90	7655882	4219005	2813005
A90	7791279	4219001	2813001
A90	7799471	4219005	2813005
A90	8301109	4219001	2813001
A90	8938936	4219003	2813003
A90	9668281	4219001	2813003
A902+	3061331	4219003	2813003
A902+	3633618	4219005	2813003
A902+	3671050	4219001	2813005
A902+	4091054	4219003	2813003
A902+	5621183	4219001	2813001
A902+	6384178	4219005	2813003
A902+	7707872	4219003	2813003
A902+3+	10067593	4219003	2813003
A902+3+	5376725	4219001	2813001
A902+3+	7709224	4219003	2813003
A902+304+	11516422	4219001	2813001
A902+304+5+	7968867	4219001	2813003
A9020	1422508	4219001	2813001
A9020	1931522	4219003	2813003
A9020	2956219	4219003	2813003
A9020	3059787	4219003	2813003
A9020	3211034	4219005	2813005
A9020	3571113	4219005	2813005
A9020	4162120	4219001	2813001
A9020	4429836	4219003	2813001
A9020	4520591	4219003	2813001
A9020	4810857	4219003	2813003
A9020	5202730	4219003	2813003
A9020	5533683	4219005	2813005
A9020	6102227	4219003	2813003
A9020	8011299	4219003	2813005
A90203+	14710202	4219003	2813001
A902030	15461546	4219001	2813001
A902030	5086964	4219003	2813003
A90203040	15482143	4219001	2813003
A902030405060	5165935	4219001	2813001
N1+	11565466	4219001	2813001
N1+	11869460	4219003	2813003
N1+	11879489	4219003	2813001
N1+	15712854	4219003	2813003
N1+	3631422	4219003	2813001
N1+	3692023	4219003	2813001
N1+	3754179	4219003	2813003
N1+	5332467	4219005	2813003
N1+	5940041	4219005	2813003
N1+	6161981	4219005	2813003
N1+	6209912	4219005	2813003
N1+	6507195	4219003	2813003
N1+	6670204	4219003	2813003
N1+	6933624	4219001	2813003
N1+	7040011	4219003	2813003
N1+	7107334	4219003	2813003
N1+	8005344	4219005	2813003
N1+	8039315	4219005	2813005
N1+	8294032	4219001	2813003
N1+	8449305	4219005	2813005
N1+	9938963	4219005	2813003
N1+2+	13571569	4219003	2813001
N1+2+	15269126	4219001	2813001
N1+2+	4868872	4219003	2813003
N1+2+	5739355	4219003	2813001
N1+2+	7721512	4219003	2813003
N1+2+	8165453	4219001	2813001
N1+2+3+	13228700	4219003	2813003
N1+2+3+	14688355	4219003	2813001
N1+2+3+	7049999	4219003	2813003
N1+2+3+	7707870	4219003	2813001
N10	10234422	4219001	2813001
N10	10364851	4219003	2813003
N10	10848632	4219005	2813005
N10	10866871	4219001	2813003
N10	11488734	4219001	2813005
N10	11557075	4219001	2813001
N10	12854265	4219001	2813001
N10	1288540	4219003	2813003
N10	1308375	4219001	2813001
N10	13234971	4219003	2813003
N10	1387512	4219007	2813007
N10	14575017	4219003	2813005
N10	14711287	4219003	2813003
N10	14860591	4219001	2813001
N10	1501683	4219003	2813003
N10	15269092	4219001	2813003
N10	15277500	4219003	2813003
N10	15468112	4219001	2813001
N10	15716776	4219003	2813003
N10	15717327	4219003	2813003
N10	15718054	4219003	2813003
N10	17198785	4219005	2813003
N10	2545453	4219005	2813003
N10	2548969	4219001	2813001
N10	3011486	4219003	2813003
N10	3594965	4219005	2813005
N10	3637425	4219001	2813001
N10	3670116	4219005	2813003
N10	3755977	4219005	2813003
N10	4428500	4219003	2813003
N10	4725453	4219003	2813003
N10	4802933	4219005	2813005
N10	4853698	4219001	2813001
N10	5206193	4219003	2813003
N10	5807666	4219005	2813005
N10	5947337	4219003	2813003
N10	5964880	4219005	2813003
N10	6369659	4219005	2813005
N10	6516279	4219003	2813003
N10	6547963	4219001	2813001
N10	7551055	7701003	2813005
N10	7607979	4219003	2813003
N10	7641811	4219001	2813001
N10	7652569	4219003	2813001
N10	7657994	4219003	2813003
N10	7914222	4219003	2813003
N10	8175528	4219003	2813003
N10	8203504	4219003	2813003
N10	8299968	4219003	2813003
N10	8364286	4219001	2813001
N10	8564720	4219003	2813003
N10	9866845	4219001	2813001
N102+	11225770	4219001	2813001
N102+	1396469	4219003	2813003
N102+	15268135	4219003	2813003
N102+	15349960	4219005	2813003
N102+	15465443	4219003	2813003
N102+	2904771	4219001	2813001
N102+	4780872	4219001	2813001
N102+	6110113	4219001	2813001
N102+	7778546	4219005	2813003
N102+	8081387	4219001	2813001
N102+3+	10993483	4219001	2813001
N102+3+	11427883	4219003	2813003
N102+3+	15709096	4219001	2813001
N102+3+	6748299	4219001	2813001
N102+3+4+5+	14857279	4219001	2813001
N102+3+4+5+6+	1211773	4219005	2813003
N102+3+4+5+6+	8450127	4219003	2813001
N102+3+405+6+7+	7040927	4219003	2813001
N102+30	15720309	4219001	2813003
N102+30	3727817	4219001	2813001
N1020	10318617	4219001	2813001
N1020	11278300	4219003	2813001
N1020	11856358	4219003	2813003
N1020	11924756	4219003	2813003
N1020	13628730	4219005	2813005
N1020	14612575	4219003	2813003
N1020	1502457	4219001	2813001
N1020	15214105	4219003	2813003
N1020	15546668	4219001	2813001
N1020	15760767	4219003	2813001
N1020	2993635	4219001	2813001
N1020	3140584	4219003	2813003
N1020	3670776	4219001	2813001
N1020	4042842	4219005	2813005
N1020	4656276	4219003	2813003
N1020	4786095	4219001	2813001
N1020	5149325	4219005	2813003
N1020	5162152	4219003	2813003
N1020	5732849	4219003	2813003
N1020	6629618	4219001	2813001
N1020	6677853	4219003	2813003
N1020	7234229	4219001	2813001
N10203+	6630048	4219003	2813003
N10203+40	3915356	4219003	2813001
N102030	11930826	4219001	2813001
N102030	15546153	4219001	2813001
N102030	15720487	4219003	2813003
N102030	4043166	4219003	2813003
N102030	5742149	4219003	2813003
N102030	6325779	4219001	2813001
N102030	8934761	4219001	2813001
N1020304050	13572927	4219003	2813001
N1020304050	1551811	4219005	2813003
N2+	14635963	4219005	2813003
N2+	5204901	4219003	2813003
N2+2+3+	13592207	4219003	2813001
N2+2+3+	5067688	4219005	2813003
N20	11305618	4219003	2813003
N20	1375805	4219001	2813001
N20	4830625	4219003	2813003
N20	6614502	4219001	2813001
N20	6844718	4219003	2813003
N202+3+	6819350	4219005	2813003
N2020	3294563	4219003	2813003
N2020	4791255	4219003	2813003
N202030	13127560	4219001	2813001
N202030	15669059	4219005	2813005
N2020304+	8138882	4219005	2813005
N3+	15466224	4219003	2813001
N3+	2204931	4219005	2813003
N3+	8338017	4219003	2813001
N3+2+	7565757	7701001	2813001
N3+20	5766308	4219001	2813001
N30	15544757	4219001	2813001
N30	5390308	4219003	2813003
N30	8187915	4219001	2813001
N30	9328338	4219003	2813005
N302+	5796957	4219005	2813003
N302+3+	6827515	4219003	2813001
N4+2+	1593270	4219005	2813005
N40	1380816	4219005	2813005
N40	3211457	4219001	2813001
N4020	11371199	4219003	2813001
N4020	15671565	4219005	2813005
N5+	13824481	4219005	2813003
N5+	5160880	4219001	2813001
N5+	5347632	4219003	2813001
N5+	6041825	4219001	2813001
N5+	6619884	4219005	2813005
N5+	8202870	4219001	2813001
N5+2+	4075918	4219001	2813003
N5+2+	7685904	4219005	2813003
N50	1537955	7701003	2813005
N50	2946504	4219005	2813005
N50	5348397	4219003	2813003
N50	5757477	4219001	2813001
N50	5952148	4219003	2813003
N50	7223699	4219003	2813001
N502+	12875179	4219001	2813001
N502+	14545984	4219001	2813001
N502+	15922184	4219003	2813001
N502+	3378717	4219005	2813005
N502+	8375802	4219005	2813005
N502+3+	10624721	4219001	2813001
N5020	11973277	4219001	2813001
N5020	15121233	4219001	2813001
N5020	15546339	4219003	2813001
N5020	4173555	4219001	2813001
N5020304050	15760788	4219003	2813003
	PcrKey'	eDisposition_19'	eSituation_13'

## Sheet: a1a
KODOR	BROJ
2813003	1
2813003	1
2813003	1
2813001	1
2813003	1
2813005	1
2813001	1
2813005	1
2813005	1
2813001	1
2813003	1
2813003	1
2813003	1
2813003	1
2813001	1
2813003	1
2813003	1
2813003	1
2813003	1
2813003	1
2813005	1
2813003	1
2813001	1
2813003	1
2813001	1
2813003	1
2813001	1
2813001	1
2813003	1
2813005	1
2813001	1
2813003	1
2813003	1
2813005	1
2813003	1
2813003	1
2813003	1
2813003	1
2813003	1
2813005	1
2813001	1
2813001	1
2813001	1
2813003	1
2813003	1
2813001	1
2813001	1
2813003	1
2813001	1
2813003	1
2813001	1
2813003	1
2813003	1
2813001	1
2813003	1
2813003	1
2813001	1
2813001	1
2813001	1
2813003	1
2813001	1
2813003	1
2813003	1
2813003	1
2813001	1
2813005	1
2813003	1
2813001	1
2813001	1
2813003	1
2813001	1
2813001	1
2813001	1
2813001	1
2813003	1
2813005	1
2813001	1
2813003	1
2813001	1
2813003	1
2813001	1
2813001	1
2813003	1
2813003	1
2813003	1
2813003	1
2813003	1
2813001	1
2813005	1
2813003	1
2813001	1
2813001	1
2813003	1
2813003	1
2813003	1
2813005	1
2813003	1
2813001	1
2813003	1
2813001	1
2813001	1
2813005	1
2813003	1
2813003	1
2813001	1
2813001	1
2813001	1
2813001	1
2813001	1
2813001	1
2813001	1
2813001	1
2813003	1
2813003	1
2813001	1
2813003	1
2813001	1
2813003	1
2813001	1
2813001	1
2813003	1
2813001	1
2813001	1
2813001	1
2813001	1
2813001	1
2813001	1
2813003	1
2813005	1
2813003	1
2813003	1
2813005	1
2813003	1
2813003	1
2813003	1
2813005	1
2813001	1
2813003	1
2813001	1
2813003	1
2813003	1
2813001	1
2813001	1
2813005	1
2813001	1
2813001	1
2813001	1
2813003	1
2813001	1
2813001	1
2813001	1
2813003	1
2813003	1
2813003	1
2813003	1
2813001	1
2813001	1
2813005	1
2813001	1
2813003	1
2813003	1
2813003	1
2813001	1
2813001	1
2813003	1
2813003	1
2813003	1
2813001	1
2813001	1
2813001	1
2813003	1
2813003	1
2813003	1
2813003	1
2813005	1
2813003	1
2813003	1
2813001	1
2813003	1
2813003	1
2813003	1
2813001	1
2813005	1
2813001	1
2813001	1
2813003	1
2813003	1
2813003	1
2813005	1
2813003	1
2813005	1
2813003	1
2813003	1
2813003	1
2813001	1
2813003	1
2813001	1
2813003	1
2813001	1
2813001	1
2813001	1
2813001	1
2813005	1
2813003	1
2813001	1
2813003	1
2813001	1
2813003	1
2813003	1
2813001	1
2813003	1
2813003	1
2813003	1
2813001	1
2813001	1
2813001	1
2813003	1
2813003	1
2813001	1
2813001	1
2813003	1
2813001	1
2813003	1
2813003	1
2813001	1
2813001	1
2813001	1
2813001	1
2813003	1
2813005	1
2813001	1
2813001	1
2813003	1
2813003	1
2813005	1
2813001	1
2813003	1
2813001	1
2813005	1
2813003	1
2813001	1
2813003	1
2813003	1
2813003	1
2813003	1
2813001	1
2813003	1
2813003	1
2813001	1
2813003	1
2813003	1
2813005	1
2813001	1
2813003	1
2813005	1
2813001	1
2813003	1
2813003	1
2813001	1
2813001	1
2813005	1
2813003	1
2813003	1
2813001	1
2813001	1

## Sheet: a1b
KODOR	BROJ
4219001	1
4219003	1
4219001	1
4219001	1
4219003	1
4219003	1
4219003	1
4219005	1
4219005	1
4219001	1
4219005	1
4219003	1
4219005	1
4219003	1
4219001	1
4219005	1
4219003	1
4219005	1
4219001	1
4219003	1
4219005	1
4219005	1
4219001	1
4219003	1
4219003	1
4219003	1
4219003	1
4219003	1
4219005	1
4219005	1
4219001	1
4219005	1
4219003	1
4219005	1
4219005	1
4219005	1
4219005	1
4219003	1
4219005	1
4219005	1
4219001	1
4219001	1
4219003	1
4219005	1
4219003	1
4219003	1
4219003	1
4219005	1
4219003	1
4219003	1
4219001	1
4219005	1
4219003	1
4219001	1
4219003	1
4219003	1
4219001	1
4219001	1
4219001	1
4219005	1
4219001	1
4219003	1
4219005	1
4219001	1
4219001	1
4219005	1
4219003	1
4219001	1
4219003	1
4219005	1
4219001	1
4219001	1
4219001	1
4219001	1
4219003	1
4219005	1
4219003	1
4219005	1
4219003	1
4219005	1
4219003	1
4219001	1
4219003	1
4219003	1
4219003	1
4219003	1
4219003	1
4219003	1
4219005	1
4219005	1
4219003	1
4219003	1
4219005	1
4219005	1
4219003	1
4219005	1
4219005	1
4219003	1
4219005	1
4219001	1
4219003	1
4219005	1
4219005	1
4219005	1
4219001	1
4219003	1
4219001	1
4219003	1
4219003	1
4219001	1
4219001	1
4219001	1
4219003	1
4219005	1
4219003	1
4219003	1
4219003	1
4219001	1
4219003	1
4219001	1
4219005	1
4219003	1
4219003	1
4219001	1
4219001	1
4219003	1
4219003	1
4219005	1
4219005	1
4219003	1
4219001	1
4219005	1
4219003	1
4219001	1
4219003	1
4219005	1
4219003	1
4219005	1
4219001	1
4219003	1
4219003	1
4219001	1
4219003	1
4219005	1
4219003	1
4219001	1
4219003	1
4219003	1
4219001	1
4219001	1
4219001	1
4219003	1
4219003	1
4219003	1
4219003	1
4219001	1
4219003	1
4219005	1
4219001	1
4219003	1
4219003	1
4219003	1
4219001	1
4219003	1
4219005	1
4219003	1
4219003	1
4219001	1
4219001	1
4219001	1
4219003	1
4219003	1
4219003	1
4219005	1
4219005	1
4219003	1
4219003	1
4219001	1
4219003	1
4219003	1
4219003	1
4219001	1
4219005	1
4219003	1
4219003	1
4219003	1
4219003	1
4219003	1
4219005	1
4219003	1
4219005	1
4219003	1
4219003	1
4219003	1
4219003	1
4219003	1
4219001	1
4219003	1
4219003	1
4219003	1
4219001	1
4219001	1
4219005	1
4219003	1
4219001	1
4219003	1
4219001	1
4219005	1
4219003	1
4219003	1
4219005	1
4219003	1
4219005	1
4219001	1
4219003	1
4219001	1
4219003	1
4219005	1
4219001	1
4219001	1
4219005	1
4219003	1
4219001	1
4219005	1
4219001	1
4219001	1
4219001	1
4219003	1
4219003	1
4219005	1
4219001	1
4219001	1
4219003	1
4219005	1
4219005	1
4219001	1
4219003	1
4219003	1
4219005	1
4219005	1
4219001	1
4219005	1
4219003	1
4219003	1
4219003	1
4219001	1
4219003	1
4219003	1
4219003	1
4219003	1
4219003	1
4219005	1
4219001	1
4219003	1
4219005	1
4219001	1
4219003	1
4219003	1
4219003	1
4219001	1
4219005	1
4219003	1
4219005	1
4219001	1
4219003	1

## Sheet: a2a
KODOR	BROJ
2813001	1
2813003	1
2813003	1
2813003	1
2813003	1
2813003	1
2813003	1
2813001	1					eDisposition_19'	eSituation_13'
2813001	1
2813001	1
2813003	1
2813001	1
2813001	1
2813003	1
2813003	1
2813003	1
2813001	1
2813003	1
2813001	1
2813003	1
2813001	1
2813003	1
2813003	1
2813001	1
2813003	1
2813001	1
2813003	1
2813003	1
2813003	1
2813005	1
2813001	1
2813005	1
2813001	1
2813003	1
2813003	1
2813003	1
2813001	1
2813005	1
2813003	1
2813003	1
2813001	1
2813001	1
2813003	1
2813003	1
2813005	1
2813003	1
2813001	1
2813003	1
2813003	1
2813001	1
2813001	1
2813001	1
2813001	1
2813001	1
2813003	1
2813001	1
2813005	1
2813003	1
2813003	1
2813003	1
2813003	1
2813003	1
2813001	1
2813003	1
2813003	1
2813001	1
2813001	1
2813003	1
2813001	1
2813003	1
2813001	1
2813001	1
2813003	1
2813003	1
2813005	1
2813001	1
2813003	1
2813001	1
2813005	1
2813001	1
2813001	1
2813003	1
2813003	1
2813003	1
2813003	1
2813001	1
2813001	1
2813001	1
2813003	1
2813001	1
2813003	1
2813003	1
2813003	1
2813005	1
2813001	1
2813001	1
2813003	1
2813001	1
2813001	1
2813001	1
2813003	1
2813001	1
2813001	1
2813003	1
2813003	1
2813001	1
2813001	1
2813003	1
2813003	1
2813003	1
2813003	1
2813005	1
2813003	1
2813001	1
2813001	1
2813005	1
2813001	1
2813003	1
2813003	1
2813003	1
2813003	1
2813003	1
2813001	1
2813003	1
2813005	1
2813001	1
2813001	1
2813005	1
2813003	1
2813001	1
2813003	1
2813001	1
2813005	1
2813003	1
2813001	1
2813003	1
2813001	1
2813001	1
2813003	1
2813003	1
2813003	1
2813003	1
2813003	1
2813003	1
2813001	1
2813001	1
2813001	1
2813001	1
2813003	1
2813003	1
2813003	1
2813003	1
2813003	1
2813005	1
2813003	1
2813001	1
2813003	1
2813003	1
2813001	1
2813003	1
2813001	1
2813001	1
2813003	1
2813001	1
2813001	1
2813001	1
2813001	1
2813001	1
2813001	1
2813001	1
2813001	1
2813003	1
2813001	1
2813001	1
2813005	1
2813001	1
2813003	1
2813001	1

## Sheet: a2b
KODOR	BROJ
4219001	1
4219003	1
4219005	1
4219003	1
4219003	1
4219003	1
4219005	1
4219001	1
4219001	1
4219003	1
4219005	1
4219003	1
4219003	1
4219003	1
4219005	1
4219003	1
4219001	1
4219005	1
4219003	1
4219003	1
4219001	1
4219005	1
4219003	1
4219001	1
4219005	1
4219001	1
4219005	1
4219005	1
4219003	1
4219005	1
4219001	1
4219003	1
4219001	1
4219003	1
4219003	1
4219005	1
4219003	1
4219005	1
4219003	1
4219005	1
4219001	1
4219001	1
4219003	1
4219003	1
4219003	1
4219003	1
4219003	1
4219005	1
4219001	1
4219001	1
4219001	1
4219001	1
4219001	1
4219003	1
4219005	1
4219001	1
4219005	1
4219003	1
4219005	1
4219003	1
4219001	1
4219005	1
4219003	1
4219005	1
4219003	1
4219001	1
4219001	1
4219003	1
4219003	1
4219005	1
4219003	1
4219001	1
4219003	1
4219001	1
4219005	1
4219003	1
4219001	1
4219003	1
4219005	1
4219001	1
4219003	1
4219005	1
4219005	1
4219005	1
4219003	1
4219001	1
4219001	1
4219001	1
4219005	1
4219001	1
4219001	1
4219003	1
4219003	1
4219005	1
4219003	1
4219001	1
4219003	1
4219001	1
4219001	1
4219001	1
4219003	1
4219001	1
4219003	1
4219005	1
4219003	1
4219003	1
4219001	1
4219005	1
4219003	1
4219003	1
4219003	1
4219005	1
4219003	1
4219001	1
4219003	1
4219003	1
4219001	1
4219003	1
4219005	1
4219003	1
4219003	1
4219003	1
4219001	1
4219003	1
4219005	1
4219001	1
4219001	1
4219001	1
4219001	1
4219001	1
4219003	1
4219001	1
4219005	1
4219003	1
4219001	1
4219005	1
4219001	1
4219001	1
4219003	1
4219003	1
4219003	1
4219003	1
4219003	1
4219003	1
4219001	1
4219001	1
4219001	1
4219003	1
4219003	1
4219005	1
4219005	1
4219003	1
4219003	1
4219005	1
4219003	1
4219001	1
4219003	1
4219005	1
4219001	1
4219005	1
4219001	1
4219001	1
4219003	1
4219003	1
4219001	1
4219001	1
4219001	1
4219001	1
4219001	1
4219001	1
4219001	1
4219005	1
4219001	1
4219001	1
4219005	1
4219001	1
4219003	1
4219001	1

## Sheet: a3a
KODOR	BROJ
2813001	1
2813005	1
2813001	1
2813001	1
2813001	1
2813001	1
2813001	1
2813001	1
2813001	1
2813005	1
2813001	1
2813001	1
2813005	1
2813005	1
2813003	1
2813003	1
2813001	1
2813005	1
2813001	1
2813003	1
2813003	1
2813001	1
2813001	1
2813003	1
2813001	1
2813003	1
2813001	1
2813003	1
2813003	1
2813003	1
2813003	1
2813001	1
2813001	1
2813003	1
2813003	1
2813003	1
2813001	1
2813003	1
2813001	1
2813001	1
2813001	1
2813003	1
2813001	1
2813003	1
2813001	1
2813001	1
2813005	1
2813003	1
2813003	1
2813003	1
2813003	1
2813001	1
2813003	1
2813003	1
2813001	1
2813001	1
2813001	1
2813003	1
2813003	1
2813001	1
2813001	1
2813003	1
2813005	1
2813001	1
2813003	1
2813003	1
2813001	1
2813005	1
2813001	1
2813005	1
2813001	1
2813001	1
2813001	1
2813003	1
2813001	1
2813001	1
2813001	1
2813005	1
2813005	1
2813003	1
2813001	1
2813001	1
2813003	1
2813001	1
2813003	1
2813003	1
2813005	1
2813001	1
2813001	1
2813001	1
2813001	1
2813001	1
2813003	1
2813001	1
2813001	1
2813003	1
2813001	1
2813001	1
2813001	1
2813001	1
2813001	1
2813003	1
2813001	1
2813003	1
2813003	1
2813005	1
2813001	1
2813001	1
2813001	1
2813001	1
2813005	1
2813003	1
2813003	1
2813001	1
2813001	1
2813003	1
2813001	1
2813001	1
2813001	1
2813003	1
2813003	1

## Sheet: a3b
KODOR	BROJ
4219001	1
4219005	1
4219001	1
4219003	1
4219003	1
4219003	1
4219001	1
4219001	1
4219001	1
4219005	1
4219003	1
4219001	1
4219005	1
4219003	1
4219005	1
4219005	1
4219003	1
4219005	1
4219003	1
4219005	1
4219005	1
4219001	1
4219003	1
4219005	1
4219005	1
4219003	1
4219001	1
4219003	1
4219005	1
4219005	1
4219003	1
4219001	1
4219001	1
4219003	1
4219005	1
4219005	1
4219003	1
4219003	1
4219003	1
4219003	1
4219001	1
4219005	1
4219001	1
4219005	1
4219001	1
4219001	1
4219005	1
4219001	1
4219005	1
4219003	1
4219005	1
4219001	1
4219005	1
4219003	1
4219003	1
4219001	1
4219001	1
4219005	1
4219005	1
4219003	1
4219003	1
4219003	1
4219005	1
4219001	1
4219003	1
4219003	1
4219001	1
4219005	1
4219001	1
4219005	1
4219001	1
4219001	1
4219001	1
4219005	1
4219001	1
4219001	1
4219001	1
4219005	1
4219005	1
4219003	1
4219001	1
4219003	1
4219003	1
4219001	1
4219003	1
4219005	1
4219003	1
4219001	1
4219001	1
4219003	1
4219003	1
4219003	1
4219005	1
4219001	1
4219001	1
4219003	1
4219001	1
4219001	1
4219001	1
4219001	1
4219001	1
4219001	1
4219001	1
4219003	1
4219003	1
4219003	1
4219001	1
4219001	1
4219001	1
4219001	1
4219005	1
4219003	1
4219005	1
4219003	1
4219003	1
4219001	1
4219001	1
4219001	1
4219001	1
4219003	1
4219003	1

## Sheet: a4a
KODOR	BROJ
2813003	1
2813001	1
2813003	1
2813003	1
2813001	1
2813005	1
2813003	1
2813001	1
2813001	1
2813003	1
2813003	1
2813003	1
2813001	1
2813003	1
2813003	1
2813003	1
2813001	1
2813001	1
2813003	1
2813003	1
2813001	1
2813003	1
2813003	1
2813001	1
2813003	1
2813001	1
2813003	1
2813003	1
2813005	1
2813001	1
2813005	1
2813003	1
2813003	1
2813003	1
2813003	1
2813003	1
2813001	1
2813003	1
2813001	1
2813005	1
2813003	1
2813001	1
2813003	1
2813003	1
2813001	1
2813001	1
2813001	1
2813001	1
2813003	1
2813001	1
2813001	1
2813001	1
2813003	1
2813001	1
2813001	1
2813001	1
2813003	1
2813003	1
2813001	1
2813001	1
2813001	1
2813003	1
2813001	1
2813003	1
2813001	1
2813003	1
2813003	1
2813003	1
2813001	1
2813001	1
2813003	1
2813003	1
2813001	1
2813005	1
2813005	1
2813003	1
2813001	1
2813001	1
2813003	1
2813001	1
2813003	1
2813003	1
2813003	1
2813005	1
2813001	1
2813001	1
2813001	1
2813001	1
2813001	1
2813003	1
2813003	1
2813003	1
2813001	1
2813003	1
2813001	1
2813003	1
2813001	1
2813001	1
2813003	1
2813003	1
2813001	1
2813005	1
2813003	1
2813003	1
2813001	1
2813001	1
2813001	1
2813001	1
2813001	1
2813003	1
2813001	1
2813003	1
2813001	1
2813001	1
2813001	1
2813001	1
2813001	1
2813005	1
2813001	1
2813003	1
2813003	1

## Sheet: a4b
KODOR	BROJ
4219003	1
4219003	1
4219005	1
4219005	1
4219001	1
4219005	1
4219003	1
4219003	1
4219001	1
4219001	1
4219003	1
4219005	1
4219001	1
4219003	1
4219003	1
4219005	1
4219001	1
4219003	1
4219005	1
4219005	1
4219003	1
4219005	1
4219003	1
4219003	1
4219005	1
4219003	1
4219005	1
4219001	1
4219003	1
4219003	1
4219005	1
4219003	1
4219001	1
4219003	1
4219001	1
4219003	1
4219001	1
4219003	1
4219003	1
4219005	1
4219005	1
4219001	1
4219005	1
4219005	1
4219003	1
4219003	1
4219001	1
4219003	1
4219003	1
4219001	1
4219003	1
4219001	1
4219005	1
4219003	1
4219001	1
4219001	1
4219003	1
4219005	1
4219001	1
4219003	1
4219003	1
4219005	1
4219001	1
4219005	1
4219001	1
4219005	1
4219003	1
4219001	1
4219003	1
4219001	1
4219003	1
4219003	1
4219001	1
4219005	1
4219005	1
4219003	1
4219001	1
4219001	1
4219005	1
4219001	1
4219005	1
4219003	1
4219005	1
4219005	1
4219003	1
4219001	1
4219001	1
4219003	1
4219001	1
4219003	1
4219003	1
4219005	1
4219001	1
4219003	1
4219001	1
4219003	1
4219001	1
4219001	1
4219003	1
4219003	1
4219001	1
4219005	1
4219003	1
4219003	1
4219001	1
4219001	1
4219001	1
4219003	1
4219001	1
4219003	1
4219001	1
4219003	1
4219001	1
4219003	1
4219001	1
4219001	1
4219003	1
4219005	1
4219003	1
4219001	1
4219003	1

## Sheet: a5a
KODOR	BROJ
2813001	1
2813001	1
2813003	1
2813003	1
2813001	1
2813001	1
2813005	1
2813003	1
2813001	1
2813003	1
2813003	1
2813003	1
2813005	1
2813003	1
2813001	1
2813001	1
2813003	1
2813003	1
2813003	1
2813001	1
2813005	1
2813001	1
2813003	1
2813003	1
2813003	1
2813003	1
2813001	1
2813001	1
2813001	1
2813003	1
2813003	1
2813003	1
2813001	1
2813001	1
2813003	1
2813005	1
2813005	1
2813003	1
2813001	1
2813003	1
2813001	1
2813001	1
2813003	1
2813003	1
2813005	1
2813001	1
2813001	1
2813001	1
2813003	1
2813001	1
2813003	1
2813003	1
2813001	1
2813001	1
2813003	1
2813003	1
2813001	1
2813001	1
2813001	1
2813001	1
2813001	1
2813003	1
2813003	1
2813003	1
2813001	1
2813005	1
2813001	1
2813003	1
2813005	1
2813003	1
2813003	1
2813005	1
2813001	1
2813003	1
2813003	1
2813001	1
2813001	1
2813001	1
2813001	1
2813003	1
2813001	1
2813003	1
2813001	1
2813003	1
2813003	1
2813003	1
2813001	1
2813005	1
2813001	1
2813005	1
2813001	1
2813003	1
2813003	1
2813003	1
2813001	1

[truncated: 19 more sheets: a5b, a6a, a6b, a7a, a7b, a8a, a8b, a9a, a9b, n1a, n1b, n2a, n2b, n3a, n3b, n4a, n4b, n5a, n5b]
